# Supplementary material for: Cu(ii) templated formation of [n]pseudorotaxanes (n = 2, 3, 4) using a tris-amino ether macrocyclic wheel and multidentate axles
Source: Royal Society of Chemistry journal article supplement (doi:10.1039/c9dt01067j), 2019-01-01
Supplement: c9dt01067j1.pdf [file c9dt01067j1.pdf]

## Supporting information

### **Cu(II) templated formation of [n]Pseudorotaxanes (n= 2,3,4) using a tris-amino ether macrocyclic wheel and multidentate axles**

Somnath Bej, Mandira Nandi, Tamal Kanti Ghosh and Pradyut Ghosh\*

School of Chemical Sciences, Indian Association for the Cultivation of Science, 2A & 2B  
Raja S. C. Mullick Road, Kolkata 700032, India. E-mail: [icpg@iacs.res.in](mailto:icpg@iacs.res.in)

---

### List of contents

|                                                                                               |         |
|-----------------------------------------------------------------------------------------------|---------|
| ❖ X-ray crystallographic data details.....                                                    | S3      |
| ❖ Calculation of Association Constants.....                                                   | S3      |
| ❖ Synthesis route of <b>NaphMC (Scheme 1S)</b> .....                                          | S4      |
| ❖ Synthetic route of <b>Phen-Acid (Scheme 2S)</b> .....                                       | S4      |
| ❖ Characterization of compound <b>A (Figure 1S- Figure 3S)</b> .....                          | S5-S6   |
| ❖ Characterization of <b>L2 (Figure 4S- Figure 6S)</b> .....                                  | S6-S7   |
| ❖ Characterization of compound <b>B (Figure 7S- Figure 9S)</b> .....                          | S8-S9   |
| ❖ Characterization of <b>L3 (Figure 10S- Figure 12S)</b> .....                                | S9-S10  |
| ❖ Synthetic route of <b>NaphMC-Cu(II) complex (Scheme 3S)</b> .....                           | S11     |
| ❖ ESI-MS spectra of [2], [3], [4]pseudorotaxanes ( <b>Figure 13S- Figure 15S</b> )....        | S11-S12 |
| ❖ Equivalent plots of [2], [3], [4]pseudorotaxanes ( <b>Figure 16S- Figure 18S</b> )....      | S13-S14 |
| ❖ Molar ratio plots of [2], [3], [4]pseudorotaxanes ( <b>Figure 19S- Figure 21S</b> )...      | S14-S15 |
| ❖ Characteristic UV/Vis and emission spectra of [n]Pseudorotaxanes ( <b>Figure 22S</b> )..    | S16     |
| ❖ Nonlinear curve fitting plot for the formation of [2]pseudorotaxane ( <b>Figure 23S</b> ).. | S16     |
| ❖ Nonlinear curve fitting plot for the formation of [3]pseudorotaxane ( <b>Figure 24S</b> ).. | S17     |
| ❖ Crystallographic details ( <b>Table 1S and Figure 25S- Figure 27S</b> ).....                | S17-S19 |
| ❖ EPR spectra of [2], [3], [4]pseudorotaxanes ( <b>Figure 28S- Figure 30S</b> ) .....         | S20     |
| ❖ Synthetic route of <b>L4 (Scheme 4S)</b> .....                                              | S21     |
| ❖ Characterization of compound <b>C (Figure 31S- Figure 32S)</b> .....                        | S21-S22 |
| ❖ Characterization of <b>L4 (Figure 33S- Figure 35S)</b> .....                                | S22-S23 |

|                                                                                                               |                |
|---------------------------------------------------------------------------------------------------------------|----------------|
| ❖ ESI-MS spectrum of <b>L4</b> axle based threaded molecule ( <b>Figure 36S</b> ).....                        | <b>S24</b>     |
| ❖ UV/Vis titration profile between <b>L4</b> with <b>NaphMC-Cu(II)</b> ( <b>Figure 37S</b> ).....             | <b>S24</b>     |
| ❖ Molar ratio plot of titration between <b>L4</b> with <b>NaphMC-Cu(II)</b> ( <b>Figure 38S</b> ).....        | <b>S25</b>     |
| ❖ IR spectra of <b>[2]</b> , <b>[3]</b> and <b>[4]</b> pseudorotaxanes ( <b>Figure 39S- Figure 41S</b> )..... | <b>S25-S26</b> |
| ❖ Synthetic route of <b>NaphMC-Ni(II)</b> complex ( <b>Scheme 5S</b> ).....                                   | <b>S27</b>     |
| ❖ ESI-MS spectrum of <b>NaphMC-Ni(II)</b> complex ( <b>Figure 42S</b> ).....                                  | <b>S27</b>     |
| ❖ Synthetic route of Ni(II) based Pseudorotaxane ( <b>Scheme 6S</b> ).....                                    | <b>S28</b>     |
| ❖ ESI-MS spectra of Ni(II) based pseudorotaxane ( <b>Figure 43S- Figure 45S</b> )...                          | <b>S28-S29</b> |
| ❖ UV/Vis titration of Ni(II) based pseudorotaxanes ( <b>Figure 46S- Figure 48S</b> )...                       | <b>S30-S31</b> |
| ❖ Molar ratio of Ni(II) based pseudorotaxanes ( <b>Figure 49S- Figure 51S</b> ).....                          | <b>S31-S32</b> |
| ❖ Characteristic UV/Vis spectra of Ni(II) based pseudorotaxanes ( <b>Figure 52S</b> ).....                    | <b>S33</b>     |
| ❖ References.....                                                                                             | <b>S34</b>     |

### X-ray crystallographic data details:

All the X-ray crystallographic details of {[2]CuPR}<sup>2+</sup> were given in Table 1S. Single green block-shaped crystals of [2]pseudorotaxane{[2]CuPR}<sup>2+</sup> were obtained upon slow evaporation of a solution of [2]CuPR(ClO<sub>4</sub>)<sub>2</sub> and excess NaOTf in CH<sub>3</sub>CN. A suitable crystal 0.06×0.03×0.02 mm<sup>3</sup> was selected and mounted on a suitable support on an Bruker APEX-II CCD diffractometer using the SAINT/ SMART APEX II software.<sup>1,2</sup> The crystal was kept at a steady *T* = 127 K during data collection. The structure was solved with the ShelXT 2014/5<sup>3</sup> structure solution program using suitable methods and by using Olex2<sup>4</sup> as the graphical interface. The model was refined with version 2018/3 of ShelXL<sup>5</sup> using Least Squares minimisation. SADABS<sup>6</sup> was applied for empirical absorption corrections. PLATON<sup>7</sup> and MERCURY 3.7<sup>8</sup> were used to generate graphical pictures of {[2]CuPR}<sup>2+</sup>.

### Calculation of Association Constants:

The association constants were calculated from UV/Vis titration experiments by plotting the absorbance changes ( $\Delta A$ ) at a fixed  $\lambda$  value against the guest concentration by using nonlinear fitting of the curves. Equation 1 is used for 1: 1 (host: guest) binding model<sup>9</sup>

$$\Delta A = \left( \frac{A}{2 * H} \right) * \left\{ \left( G_0 + H_0 + \frac{1}{K} \right) - \sqrt{\left( G_0 + H_0 + \frac{1}{K} \right)^2 + 4G_0H_0} \right\} \dots (1)$$

Where, A= absorbance intensity value upon each addition of the guest, change in absorption intensity  $\Delta A = (A - A_0)$ ,  $[H]_0$  = initial concentration of the host,  $[G]_0$  = initial concentration of the guest and K is the association constants.

Similarly, equations 2 is used for non-linear curve fitting of 1:2 (host: guest) binding model.<sup>10</sup>

$$\Delta A = \frac{A_{\Delta HG1} K_1 [H]_0 [G] + A_{\Delta HG2} K_1 K_2 [H]_0 [G]^2}{1 + K_1 [G] + K_1 K_2 [G]^2} \dots \dots \dots (2)$$

Where, K<sub>1</sub> and K<sub>2</sub> are the stepwise association constants.

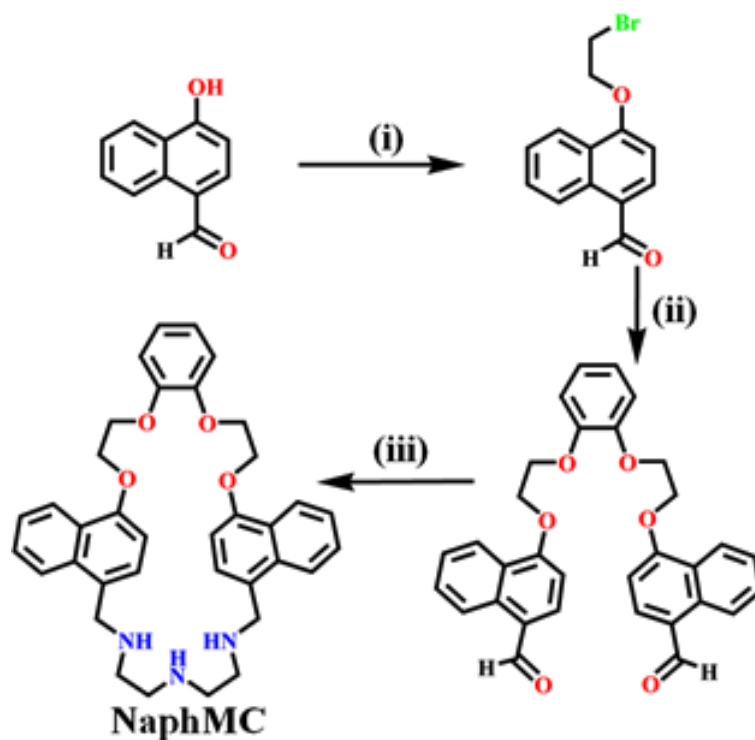

**Scheme 1S.** Synthesis route of **NaphMC**<sup>11</sup>: (i) 1,2-dibromoethane,  $K_2CO_3$ ,  $CH_3CN$ , reflux; (ii) 1,2-dihydroxybenzene,  $K_2CO_3$ ,  $CH_3CN$ , reflux; (iii) diethylenetriamine,  $CH_2Cl_2$ - $CH_3OH$ , RT, 15h,  $NaBH_4$ .

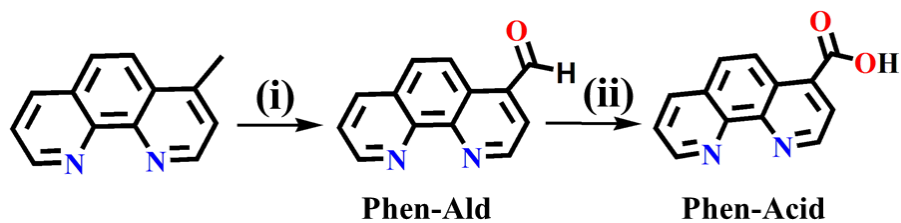

**Scheme 2S.** Synthetic route of **Phen-Acid**<sup>12</sup>: (i)  $SeO_2$ , dioxane, reflux; (ii) Conc.  $HNO_3$ , reflux.

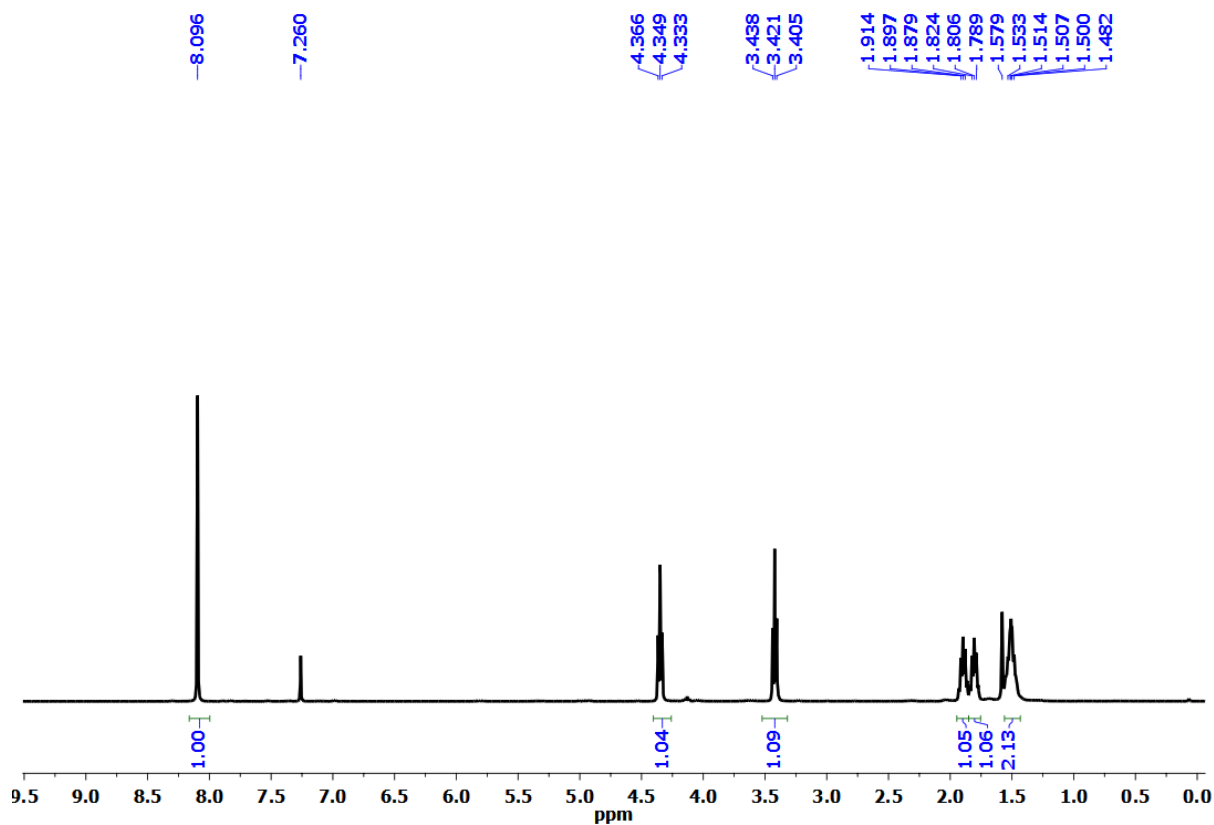

**Figure 1S.**  $^1\text{H}$ -NMR spectrum of compound A in  $\text{CDCl}_3$  in 400 MHz at 298K.

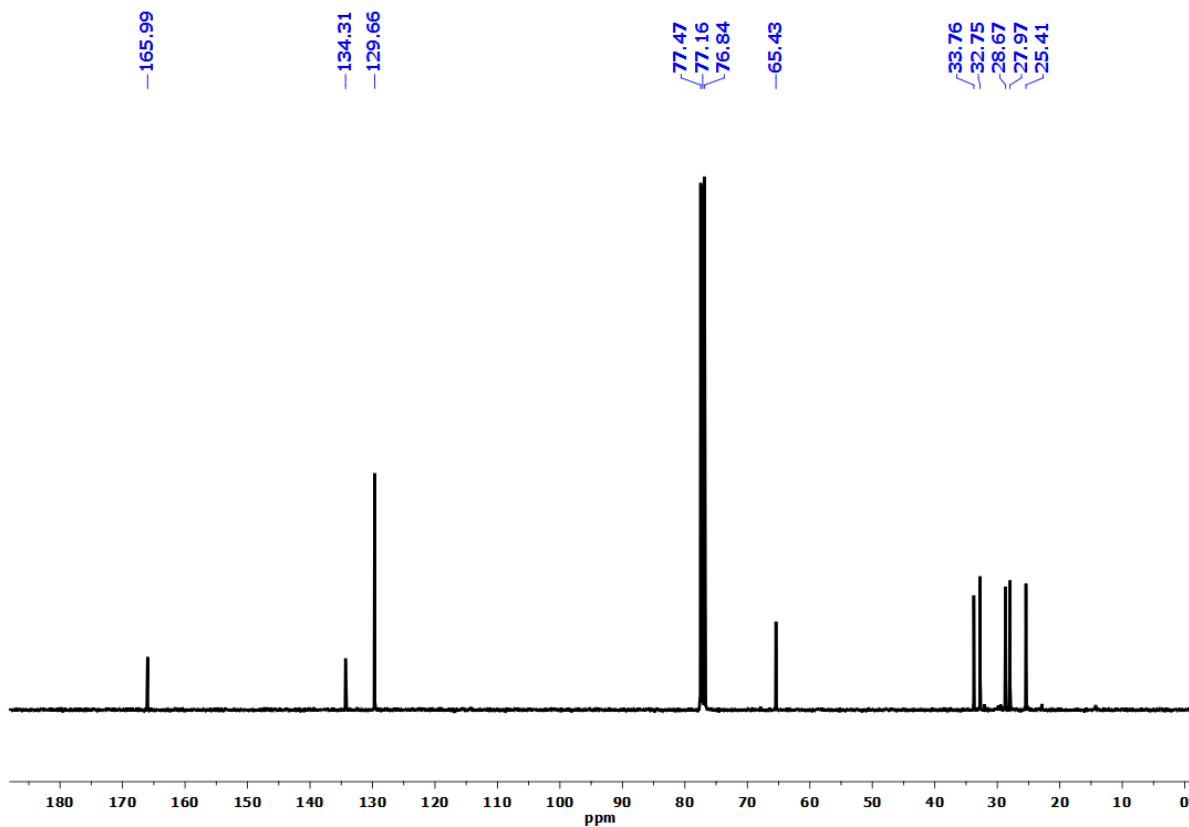

**Figure 2S.**  $^{13}\text{C}$ -NMR spectrum of compound A in  $\text{CDCl}_3$  in 100 MHz at 298K.

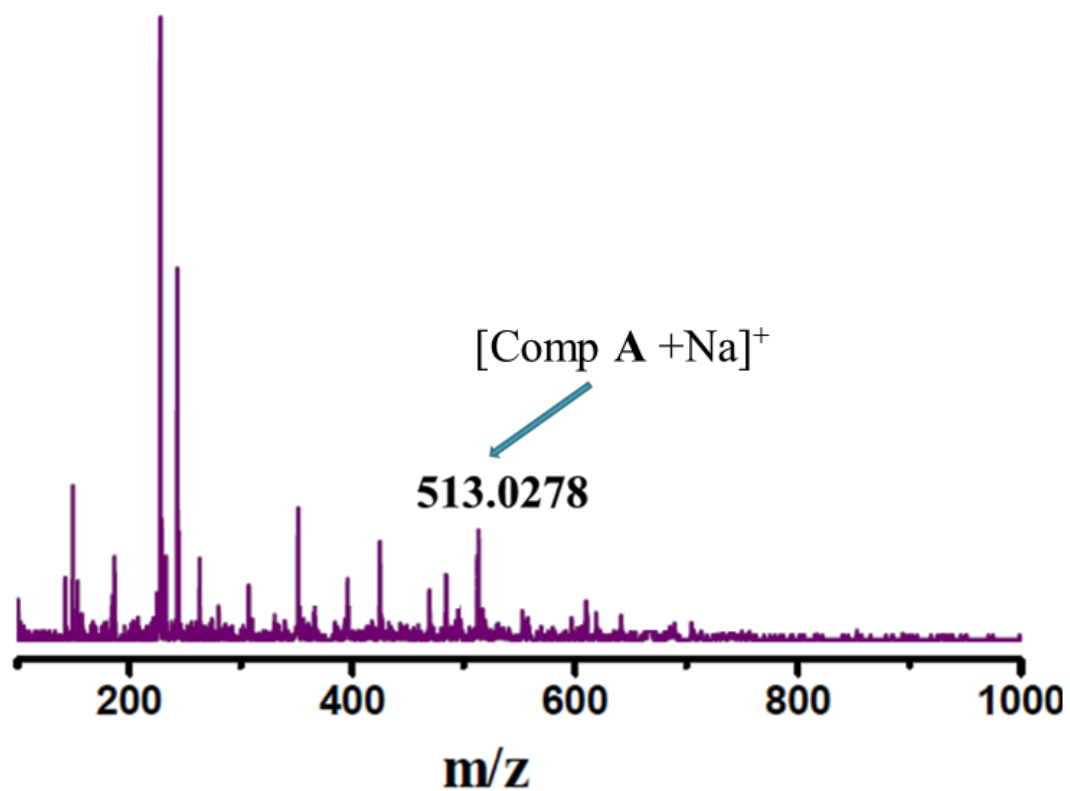

Figure 3S. ESI-MS(+ve) spectrum of compound A at 298K.

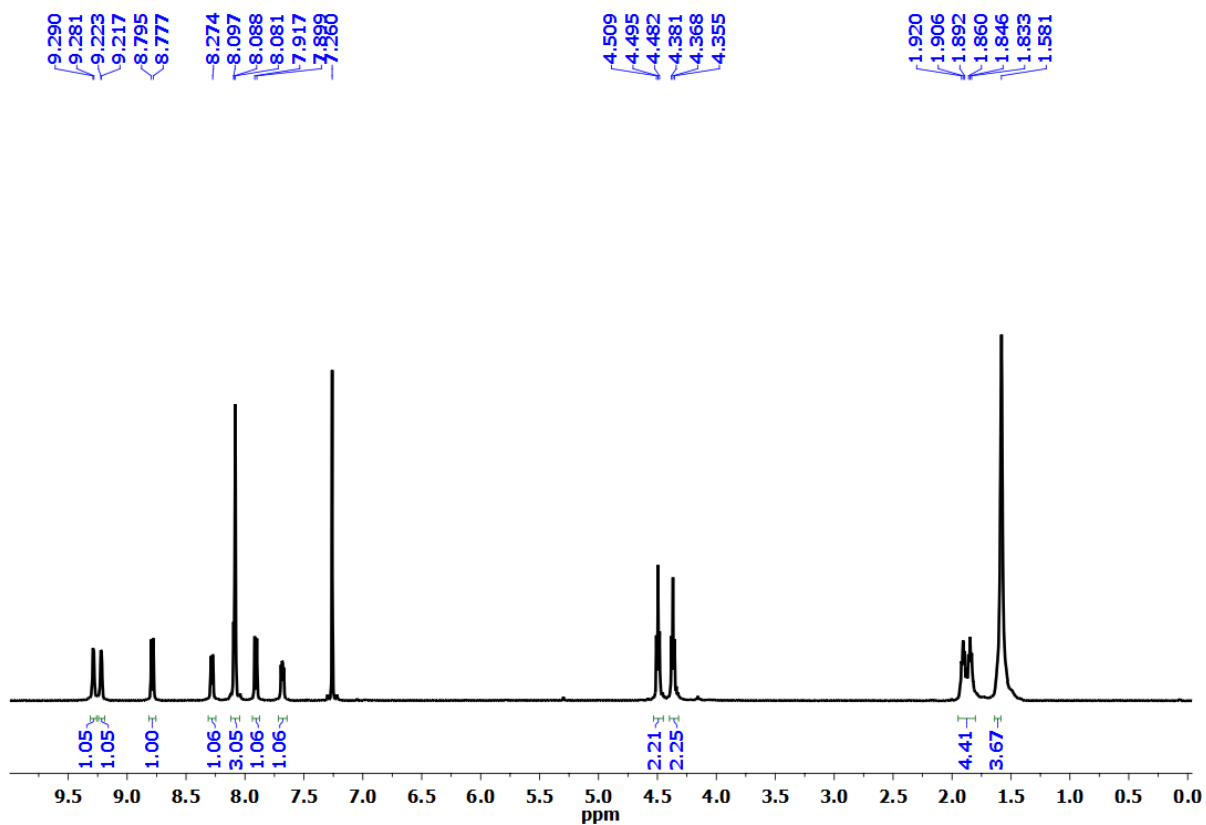

Figure 4S.  $^1\text{H-NMR}$  spectrum of L2 in  $\text{CDCl}_3$  in 500 MHz at 298K.

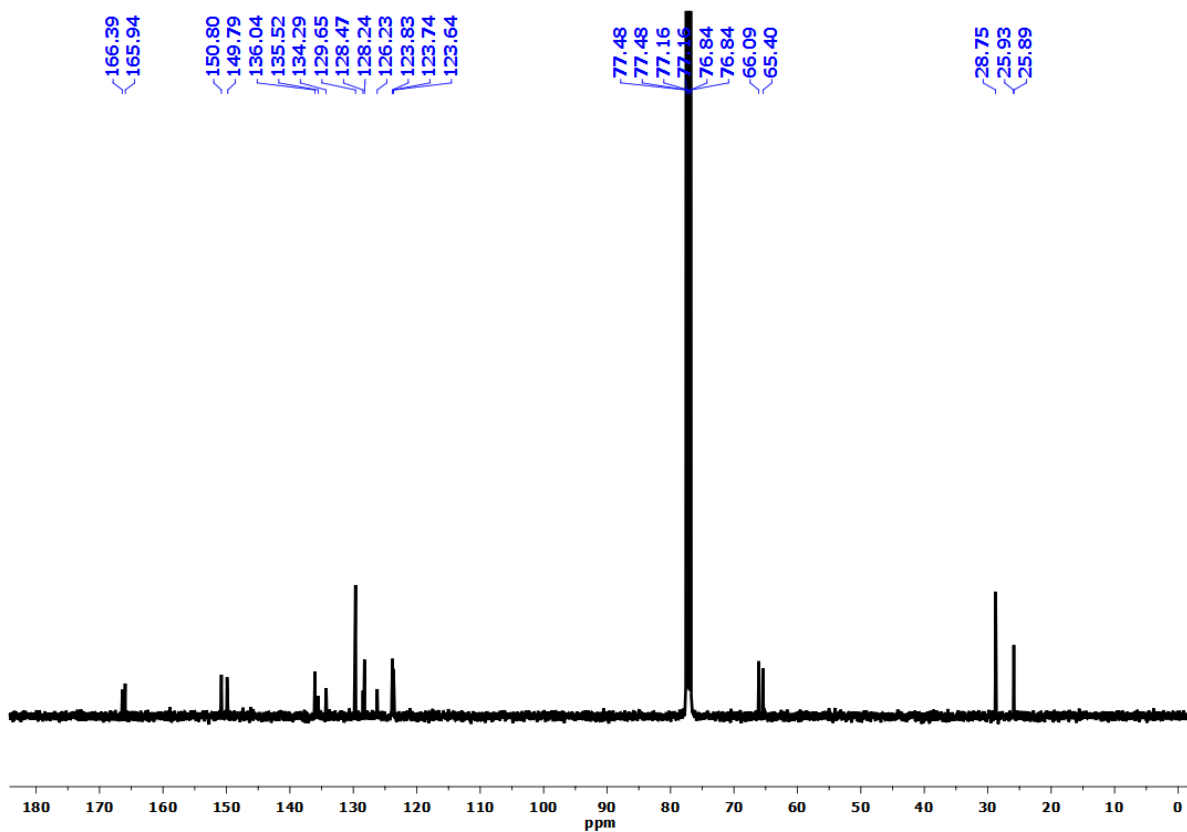

Figure 5S.  $^{13}\text{C}$ -NMR spectrum of **L2** in  $\text{CDCl}_3$  in 100 MHz at 298K.

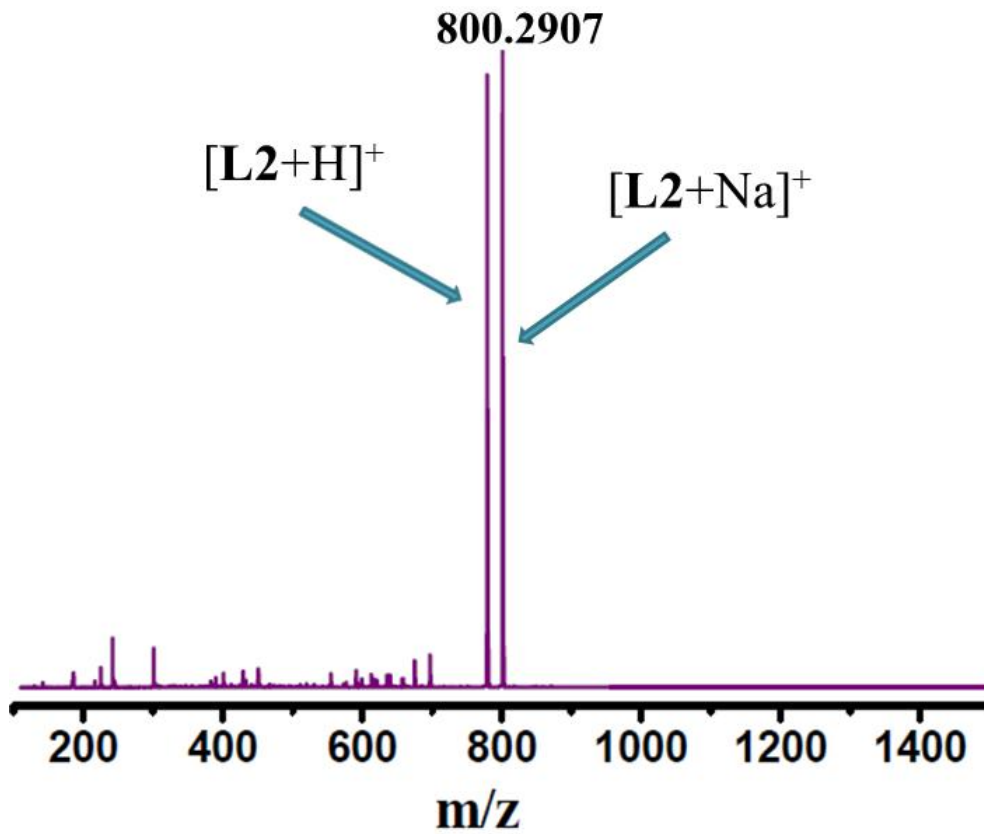

Figure 6S. ESI-MS(+ve) spectrum of **L2** at 298K.

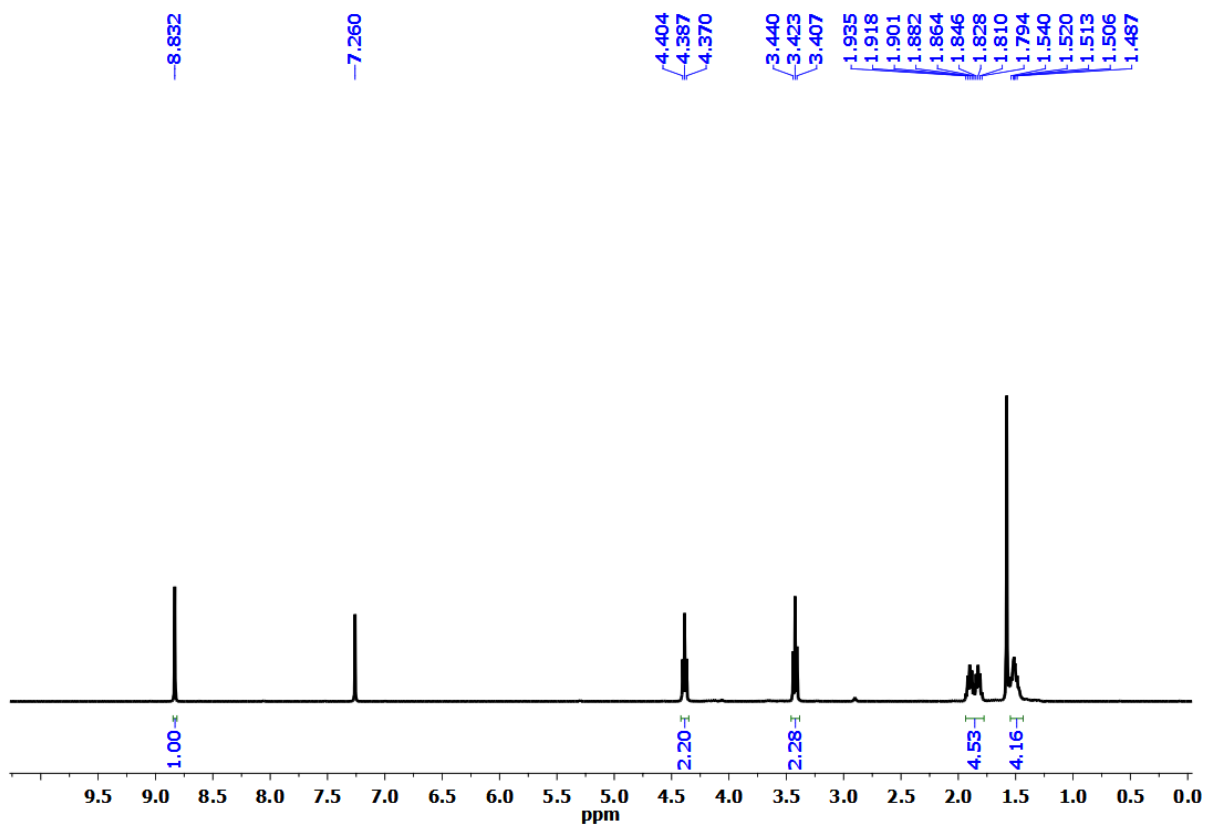

**Figure 7S.**  $^1\text{H}$ -NMR spectrum of compound **B** in  $\text{CDCl}_3$  in 400 MHz at 298K.

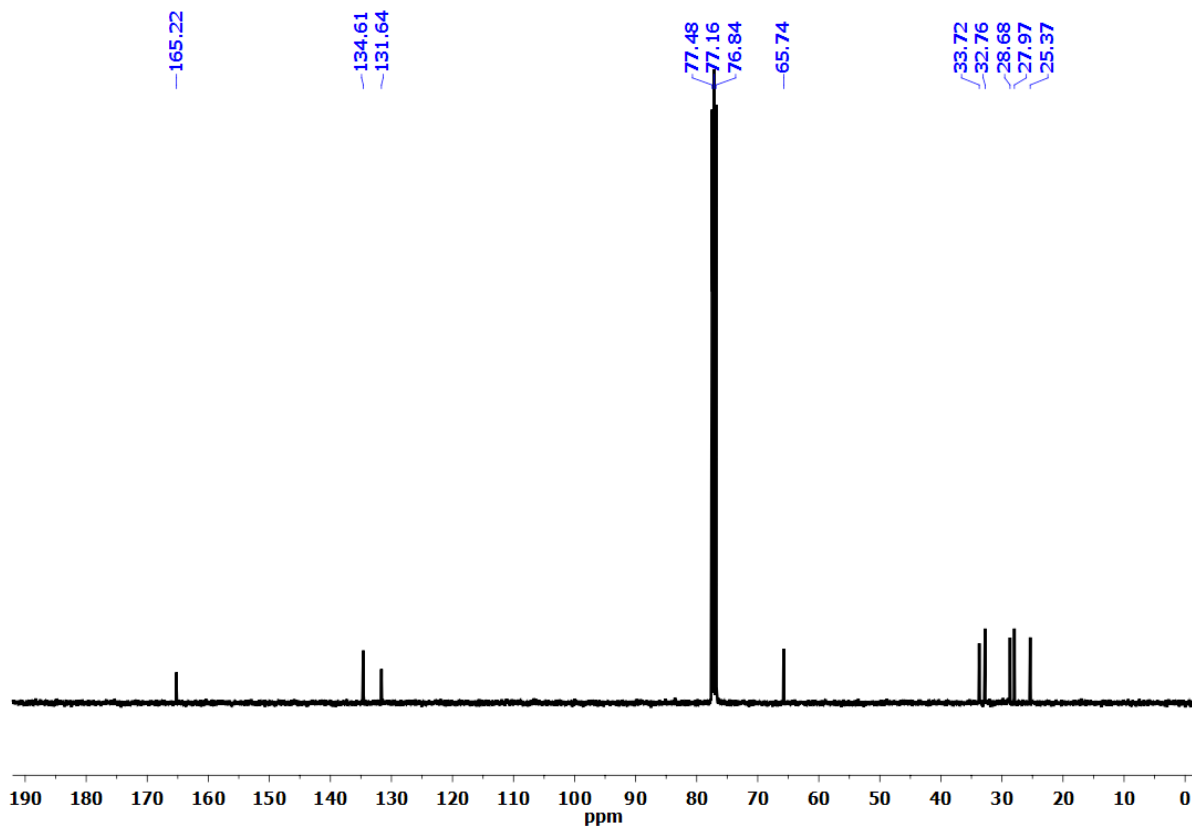

**Figure 8S.**  $^{13}\text{C}$ -NMR spectrum of **B** in  $\text{CDCl}_3$  in 100 MHz at 298K.



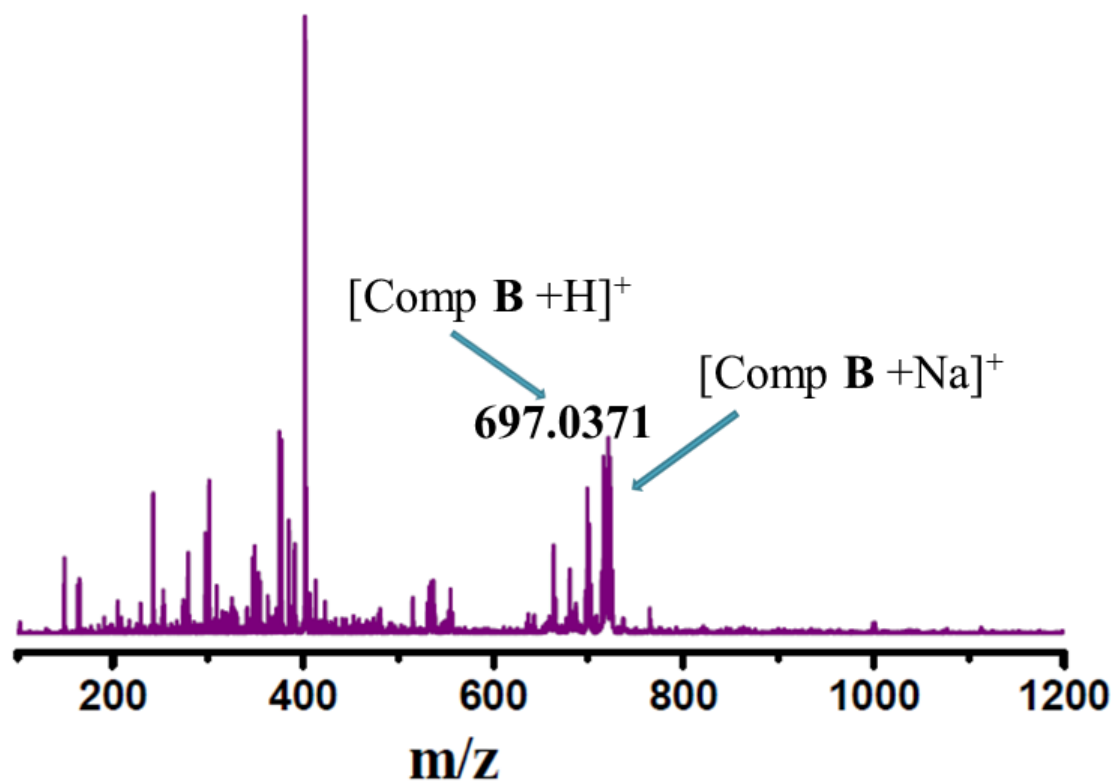

Figure 9S. ESI-MS(+ve) spectrum of compound **B** at 298K.

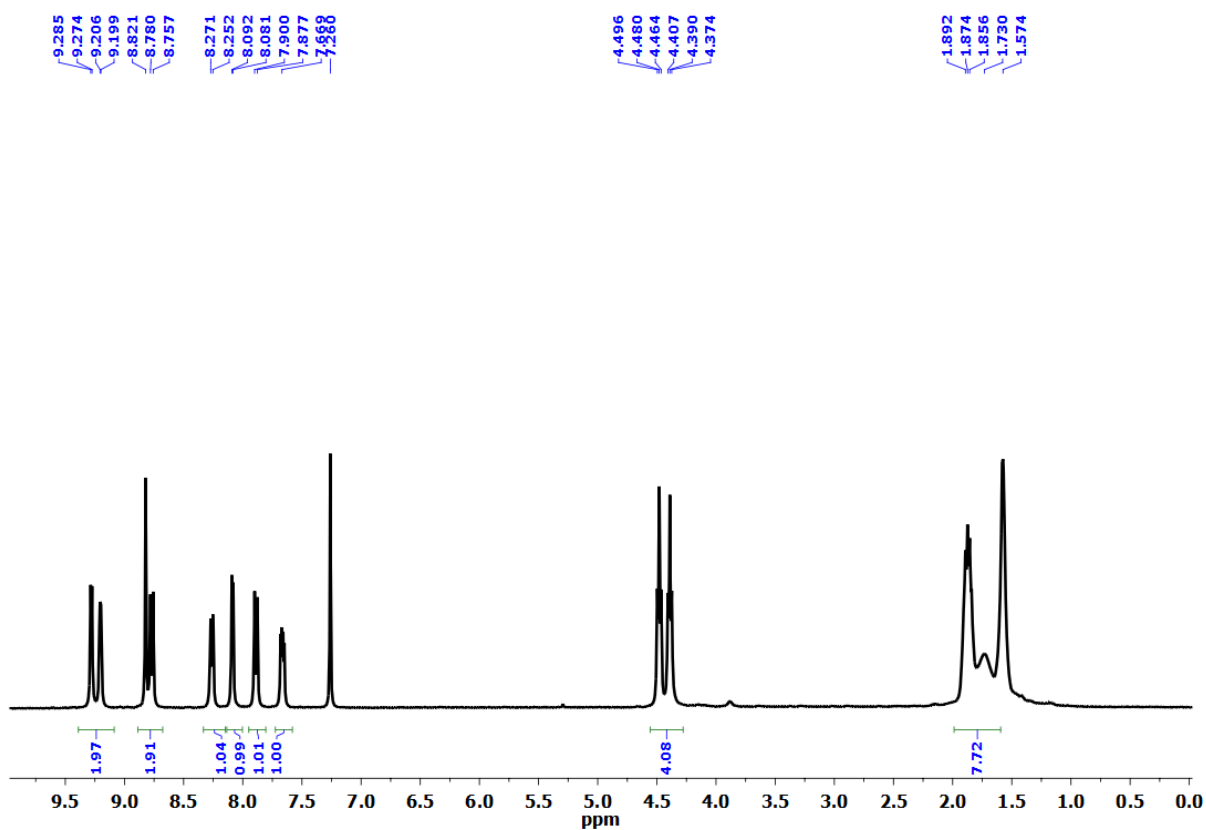

Figure 10S.  $^1\text{H-NMR}$  spectrum of **L3** in  $\text{CDCl}_3$  in 400 MHz at 298K.

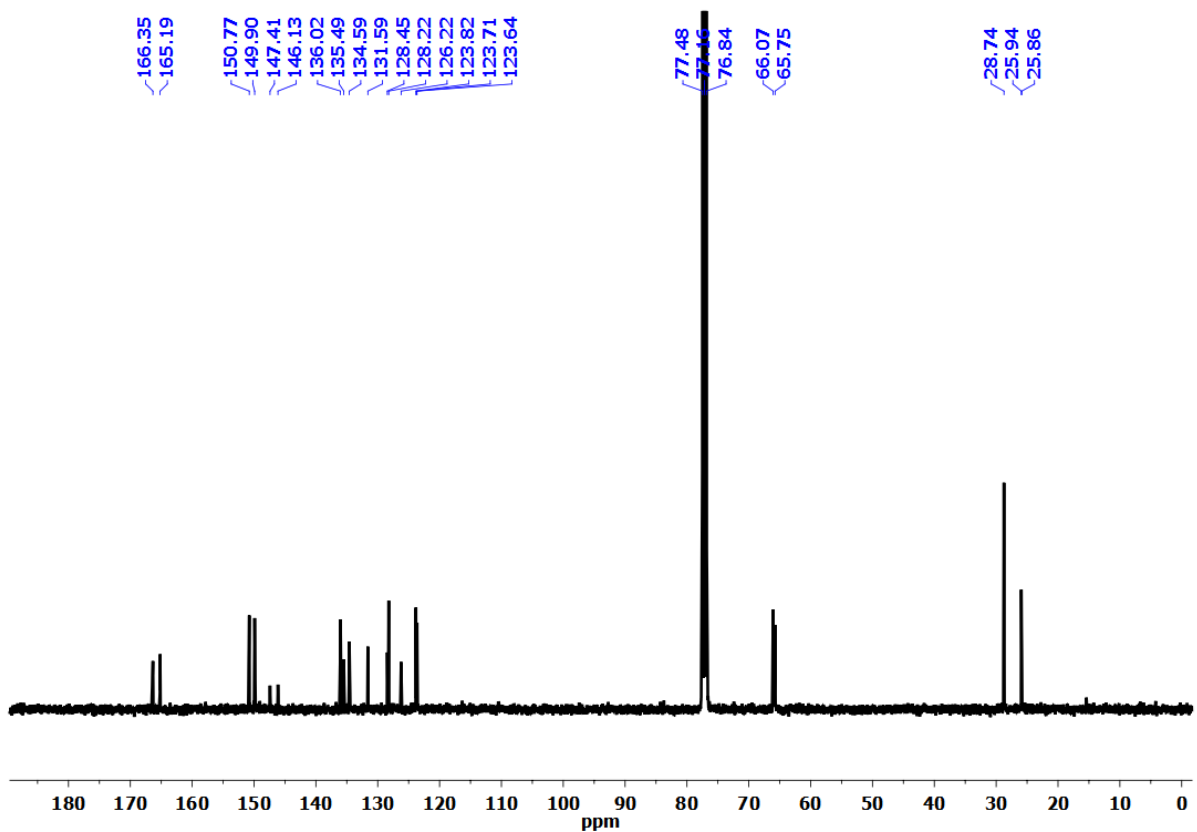

Figure 11S.  $^{13}\text{C}$ -NMR spectrum of L3 in  $\text{CDCl}_3$  in 100 MHz at 298K.

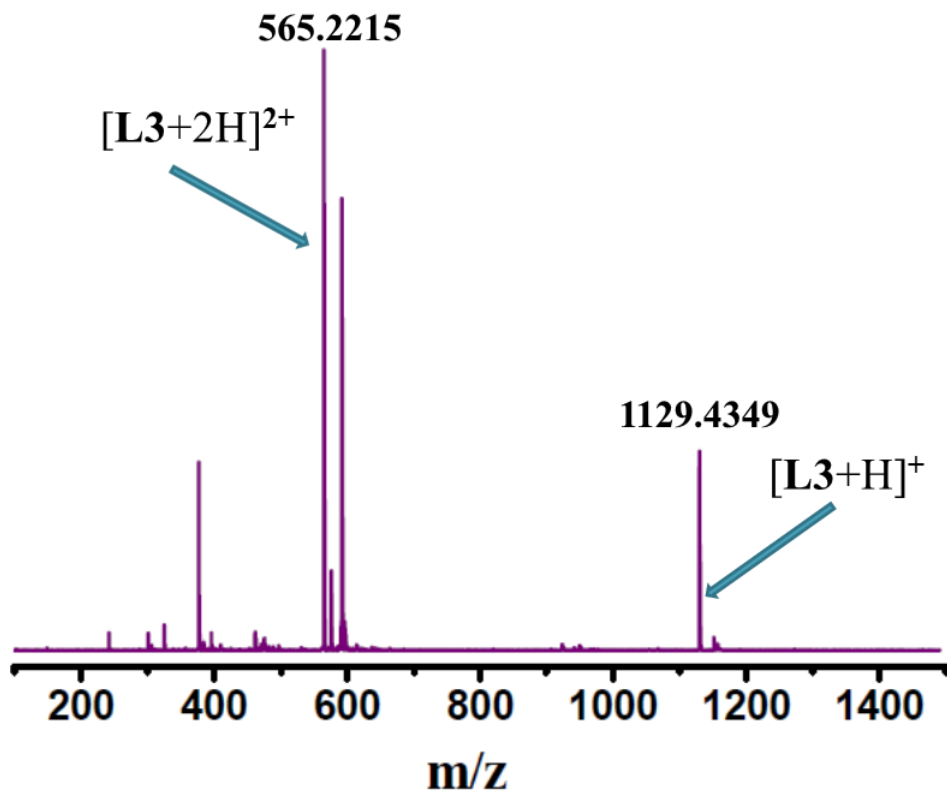

Figure 12S. ESI-MS(+ve) spectrum of L3 at 298K.

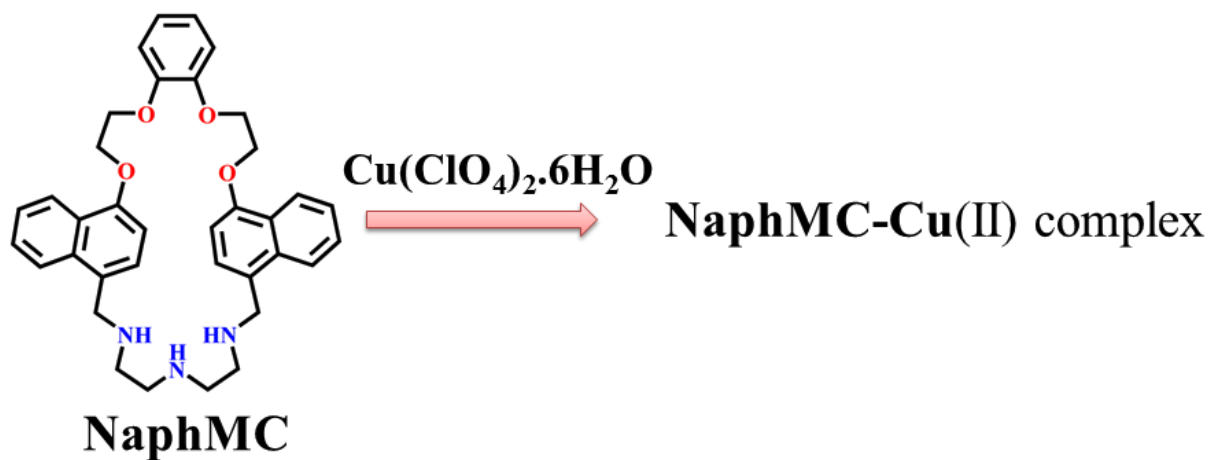

Scheme 3S. Synthetic route of NaphMC-Cu(II) complex

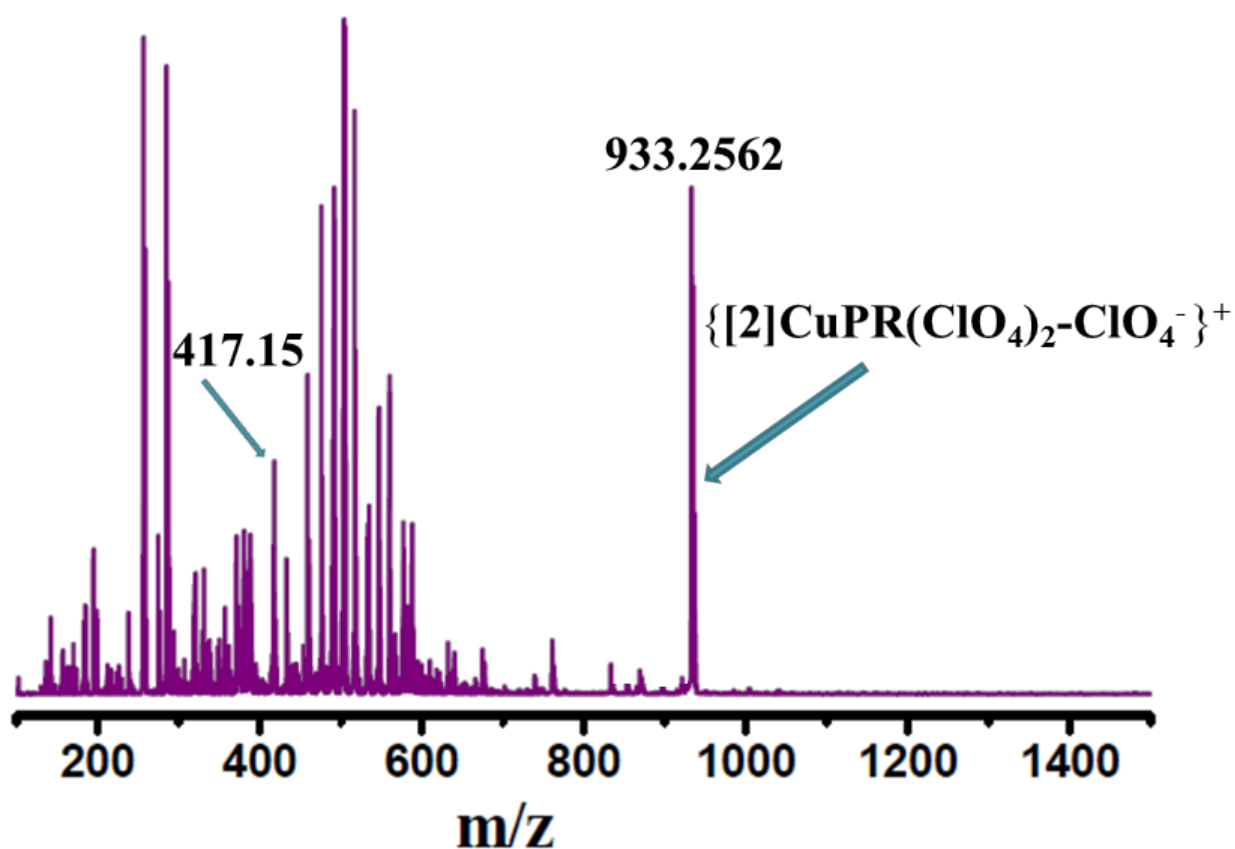

Figure 13S. ESI-MS(+ve) spectrum of  $[2]\text{CuPR}(\text{ClO}_4)_2$  at 298K.

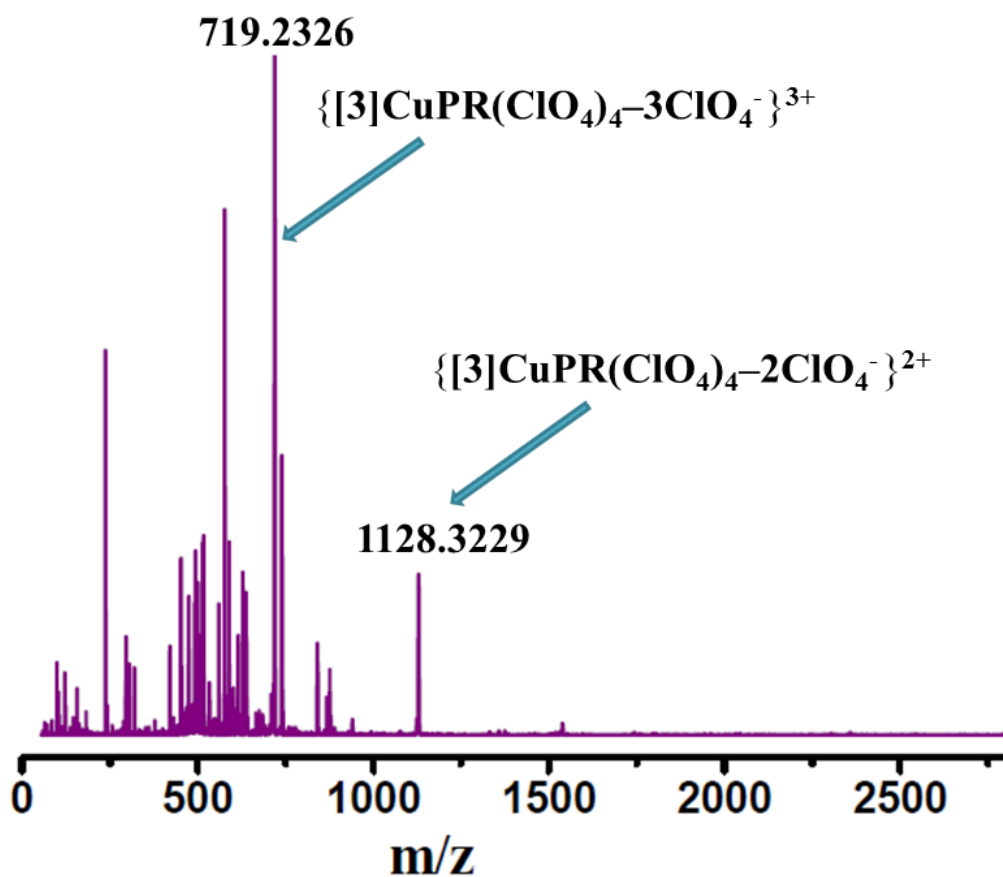

Figure 14S. ESI-MS(+ve) spectrum of  $[3]\text{CuPR}(\text{ClO}_4)_4$  at 298K.

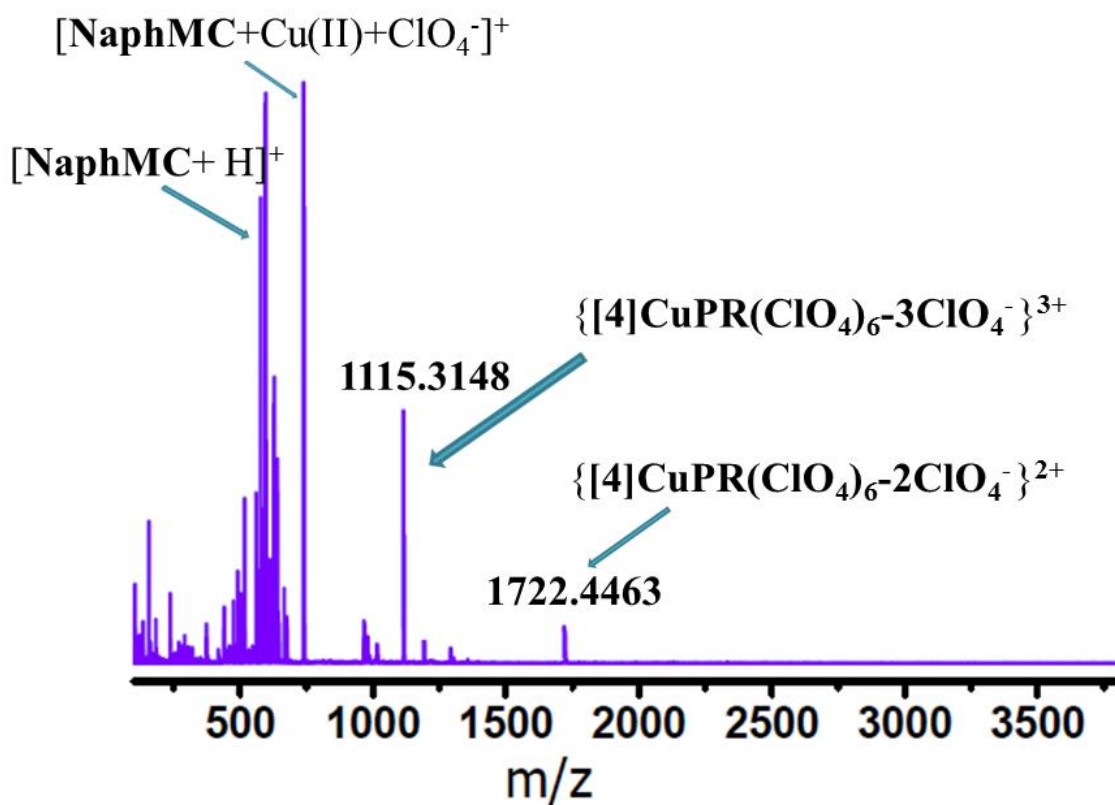

Figure 15S. ESI-MS(+ve) spectrum of  $[4]\text{CuPR}(\text{ClO}_4)_6$  at 298K.

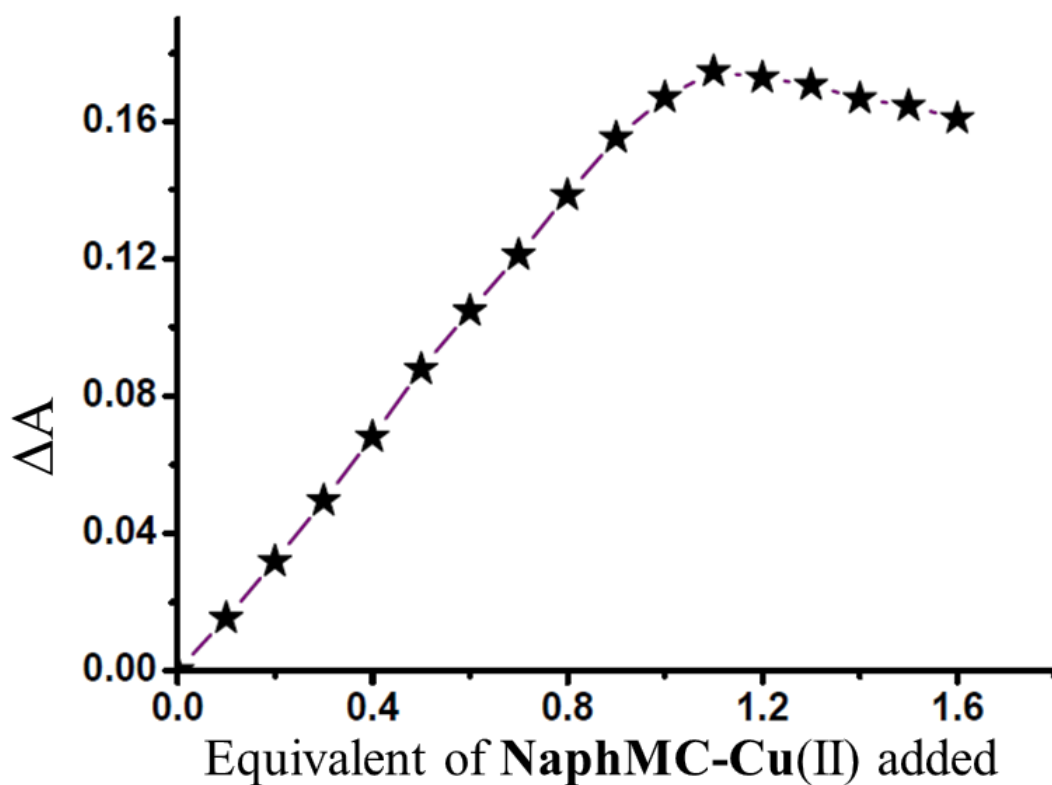

**Figure 16S.** Equivalence plot from UV/Vis titration experiment between L1 and NaphMC-Cu(II) complex.

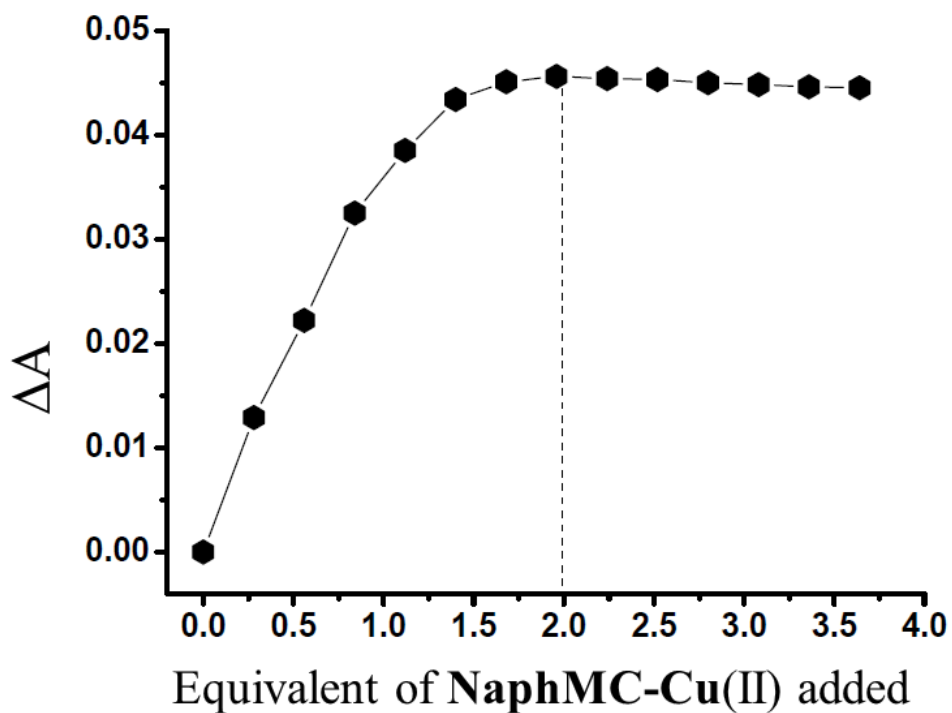

**Figure 17S.** Equivalence plot from UV/Vis titration experiment between L2 and NaphMC-Cu(II) complex.

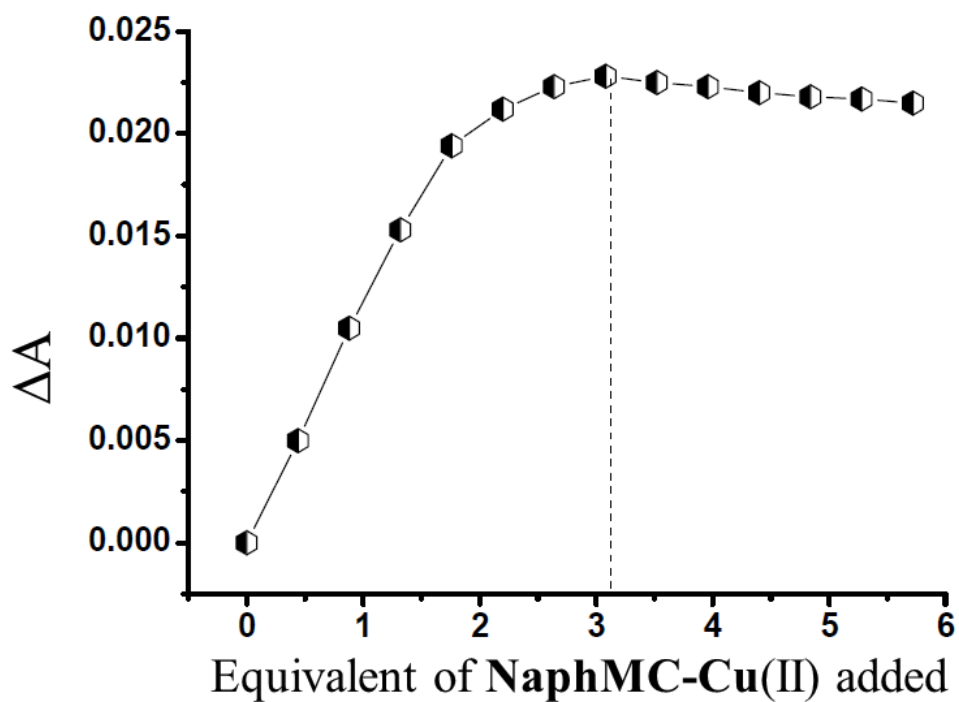

Figure 18S. Equivalence plot from UV/Vis titration experiment between L3 and NaphMC-Cu(II) complex.

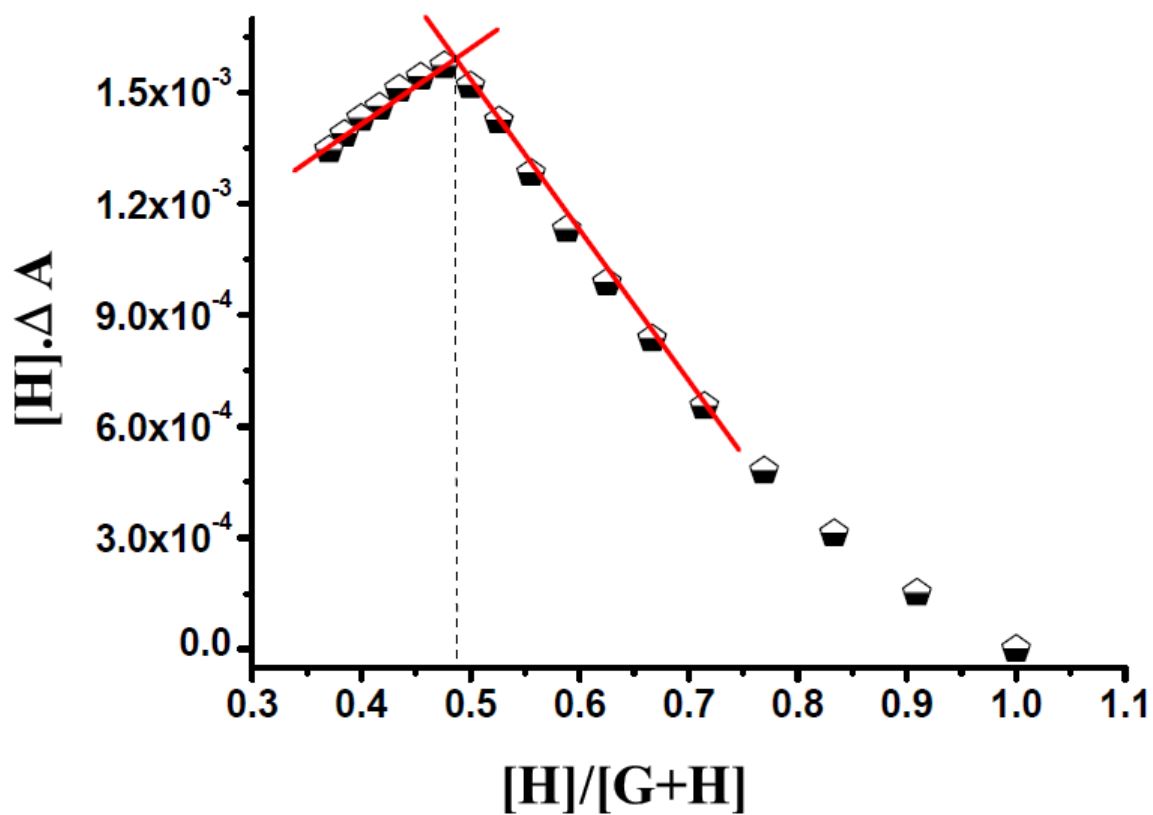

Figure 19S. Molar ratio plot from UV/Vis titration experiment between L1 with NaphMC-Cu(II) solution.

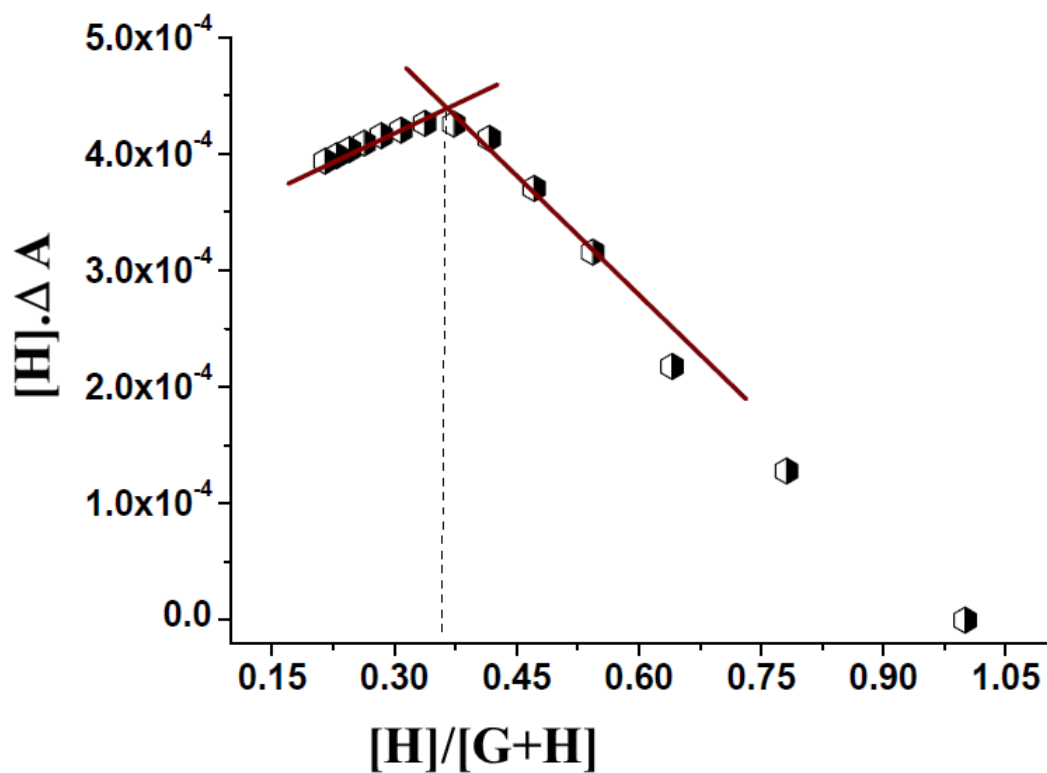

Figure 20S. Molar ratio plot from UV/Vis titration experiment between L2 with NaphMC-Cu(II) solution.

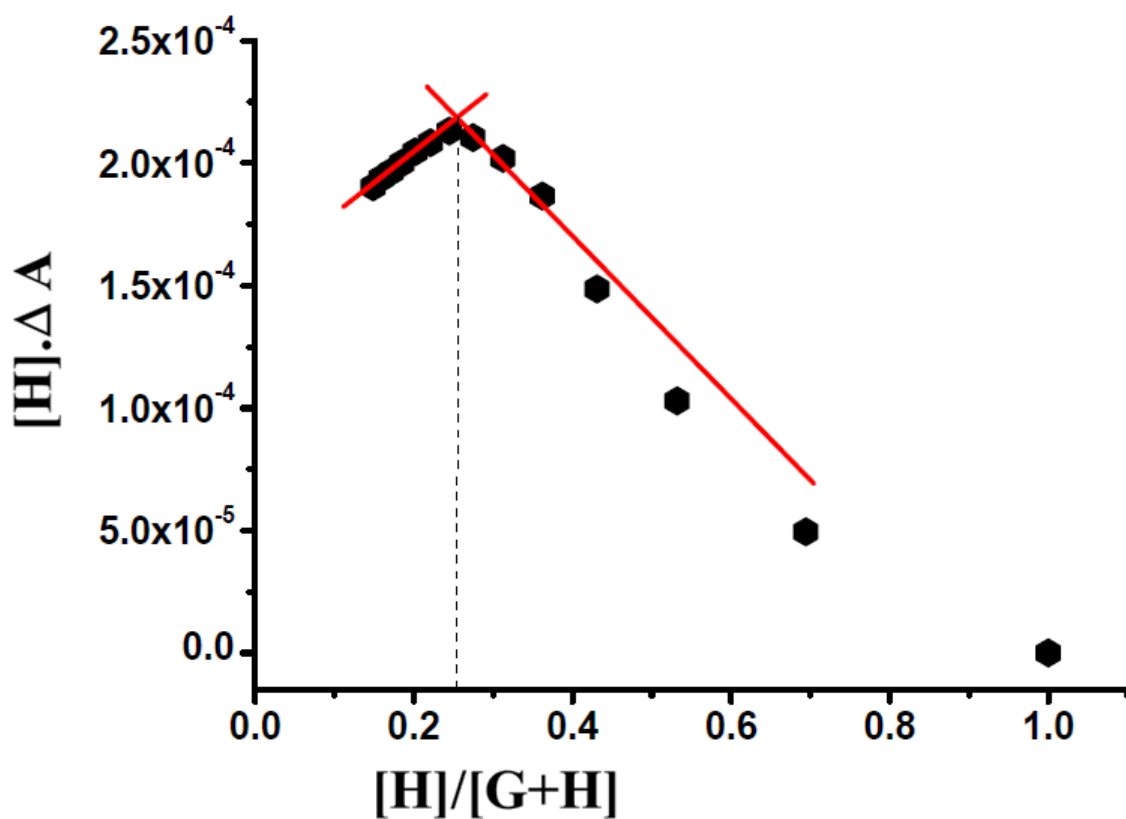

Figure 21S. Molar ratio plot from UV/Vis titration experiment between L3 with NaphMC-Cu(II) solution.

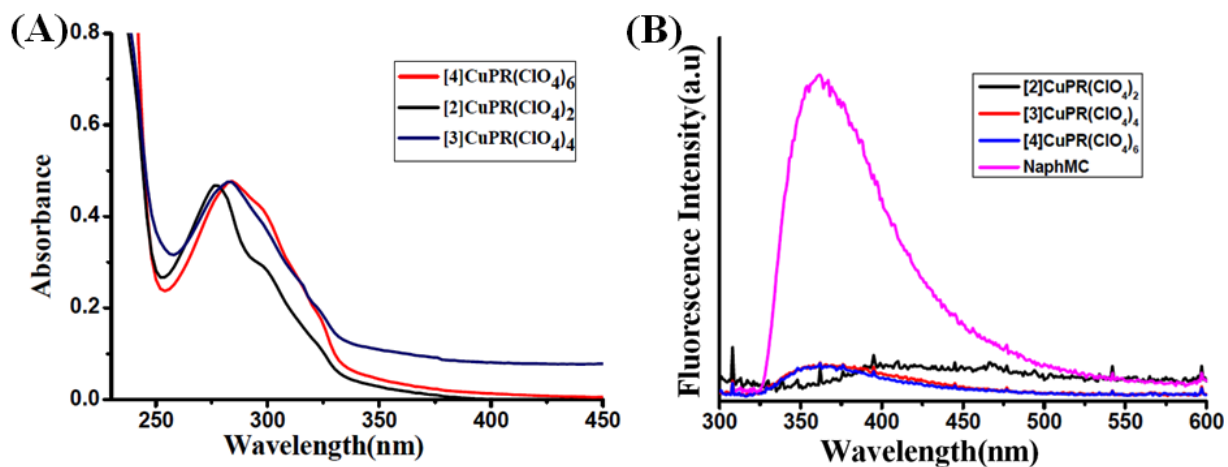

**Figure 22S.** Characteristic (A) UV/Vis and (B) emission spectra of pseudorotaxanes:  $[2]\text{CuPR}(\text{ClO}_4)_2$ ,  $[3]\text{CuPR}(\text{ClO}_4)_4$  and  $[4]\text{CuPR}(\text{ClO}_4)_6$  in  $\text{CH}_3\text{CN}$  at 298K.

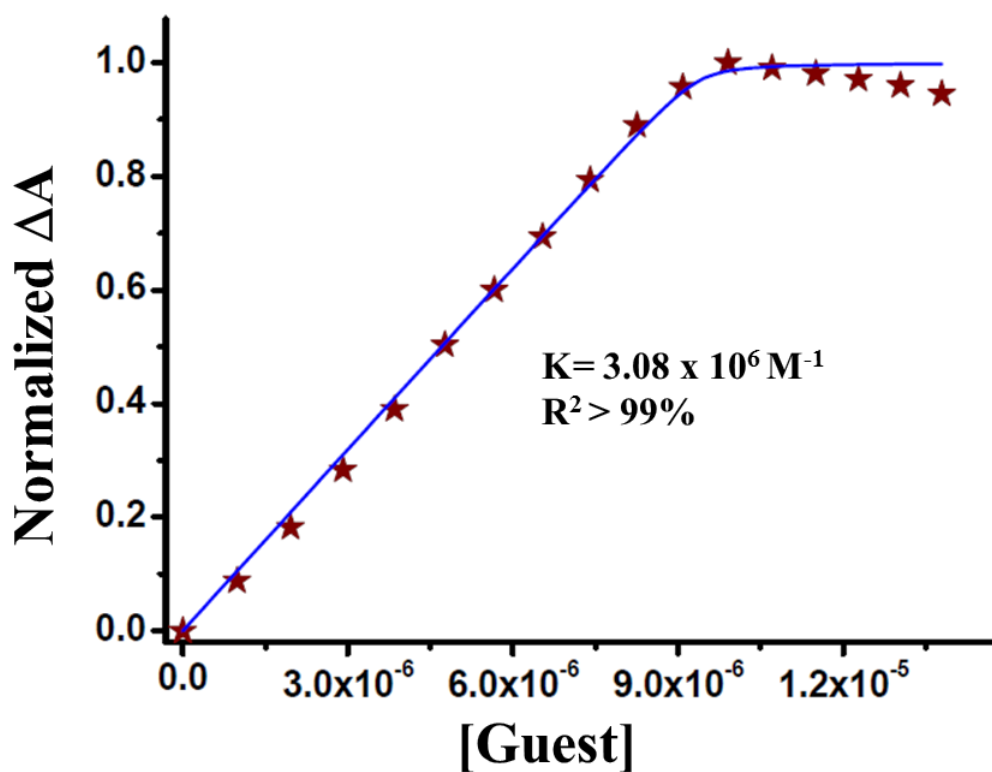

**Figure 23S.** Nonlinear 1:1 curve fitting to determine binding constant from UV/Vis titration experiment between **LI** with **NaphMC-Cu(II)** solution.



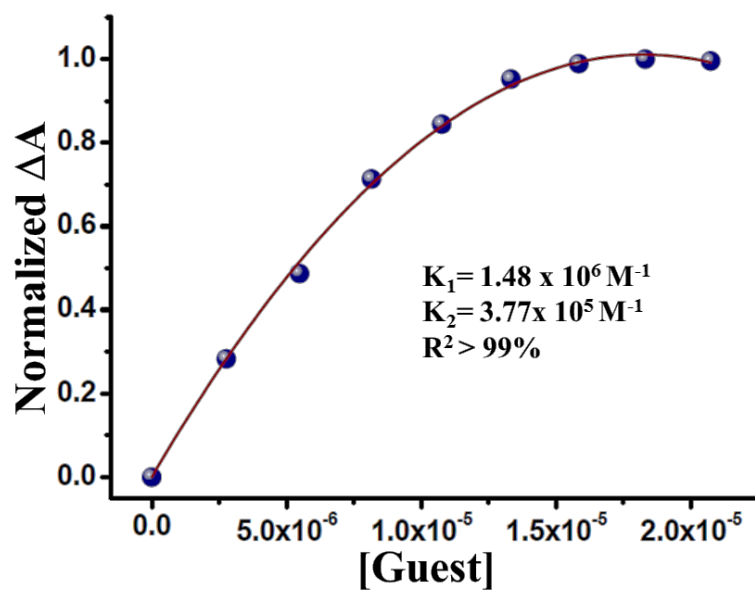

**Figure 24S.** Nonlinear 1:1 curve fitting to determine binding constant from UV/Vis titration experiment between **L2** with NaphMC-Cu(II) solution.

**Crystallographic details of  $([2]\text{CuPR})^{2+}$**

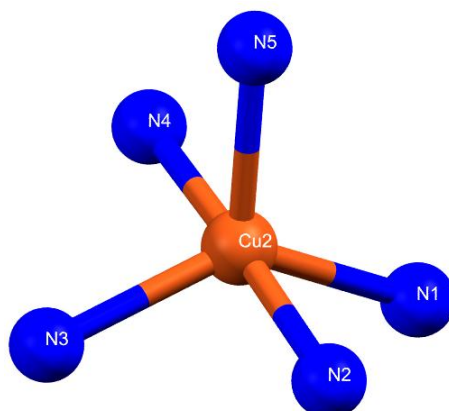

**Figure 25S.** Geometry around the Cu(II) center of  $([2]\text{CuPR})^{2+}$  ( $\tau = 0.638$ ).

**Table 1S** . Crystallographic data of  $([2]\text{CuPR})^{2+}$ 

| <b>Compound</b>                     | <b>[2]pseudorotaxane</b>                                                  |
|-------------------------------------|---------------------------------------------------------------------------|
| Formula                             | $\text{C}_{55}\text{CuF}_6\text{H}_{55}\text{N}_7\text{O}_{10}\text{S}_2$ |
| $D_{\text{calc.}}/\text{g cm}^{-3}$ | 1.498                                                                     |
| $\mu/\text{mm}^{-1}$                | 0.570                                                                     |
| Formula Weight                      | 1215.72                                                                   |
| Colour                              | GREEN                                                                     |
| Shape                               | block                                                                     |
| Size/ $\text{mm}^3$                 | 0.06×0.03×0.02                                                            |
| $T/\text{K}$                        | 127(2)                                                                    |
| Crystal System                      | monoclinic                                                                |
| Flack Parameter                     | 0.474(17)                                                                 |
| Hooft Parameter                     | 0.487(9)                                                                  |
| Space Group                         | $P2_1$                                                                    |
| $a/\text{\AA}$                      | 14.630(4)                                                                 |
| $b/\text{\AA}$                      | 15.523(4)                                                                 |
| $c/\text{\AA}$                      | 24.015(7)                                                                 |
| $\alpha/^\circ$                     | 90                                                                        |
| $\beta/^\circ$                      | 98.701(9)                                                                 |
| $\gamma/^\circ$                     | 90                                                                        |
| $V/\text{\AA}^3$                    | 5391(2)                                                                   |
| $Z$                                 | 4                                                                         |
| $Z'$                                | 2                                                                         |
| Wavelength/ $\text{\AA}$            | 0.71073                                                                   |
| Radiation type                      | $\text{MoK}\alpha$                                                        |
| $\theta_{\text{min}}/^\circ$        | 2.192                                                                     |
| $\theta_{\text{max}}/^\circ$        | 25.026                                                                    |
| Measured Refl.                      | 45000                                                                     |
| Independent Refl.                   | 18637                                                                     |
| Reflections with $I > 2(I)$         | 14949                                                                     |
| $R_{\text{int}}$                    | 0.0917                                                                    |
| Parameters                          | 1488                                                                      |
| Restraints                          | 285                                                                       |
| Largest Peak                        | 0.661                                                                     |
| Deepest Hole                        | -0.462                                                                    |
| Goof                                | 1.020                                                                     |
| $wR_2$ (all data)                   | 0.1909                                                                    |
| $wR_2$                              | 0.1748                                                                    |
| $R_1$ (all data)                    | 0.0851                                                                    |
| $R_1$                               | 0.0688                                                                    |
| CCDC number                         | 1892956                                                                   |

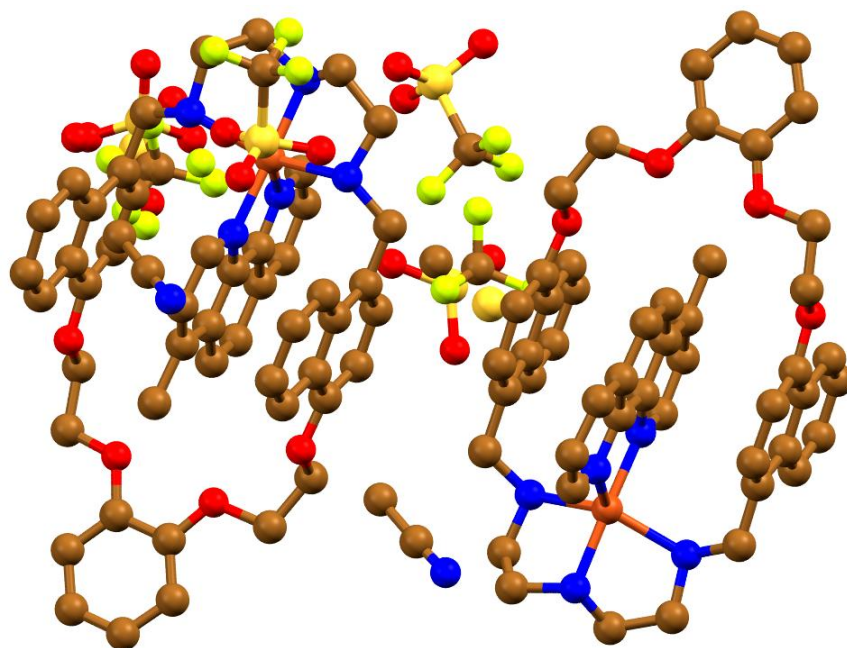

**Figure 26S.** Single Crystal X-ray structure of  $([2]\text{CuPR})^{2+}$  (Ball and stick model). Hydrogen atoms are omitted for clarity.

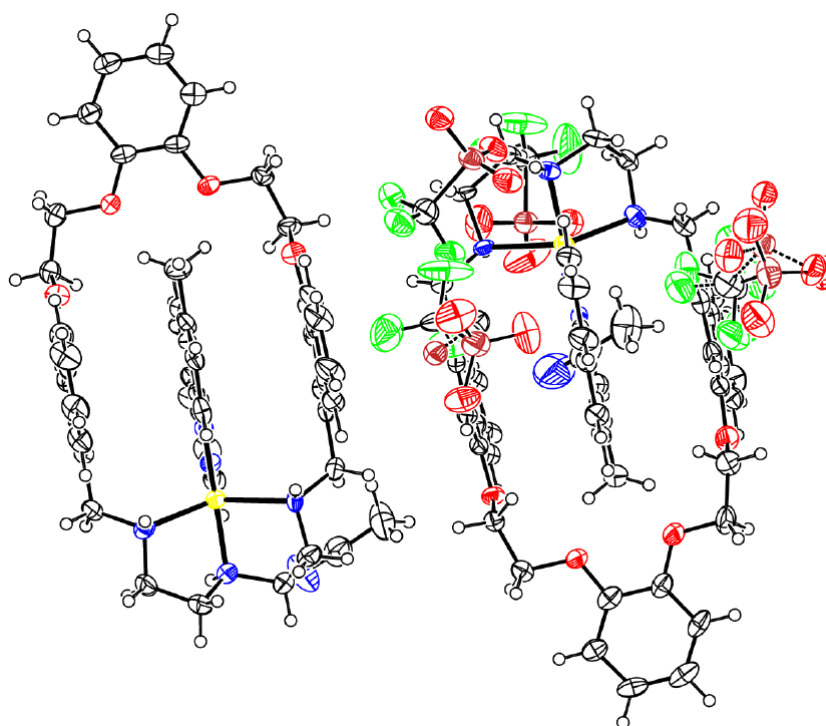

**Figure 27S.** Single Crystal X-ray structure of  $([2]\text{CuPR})^{2+}$  (ellipsoid model using platon version).

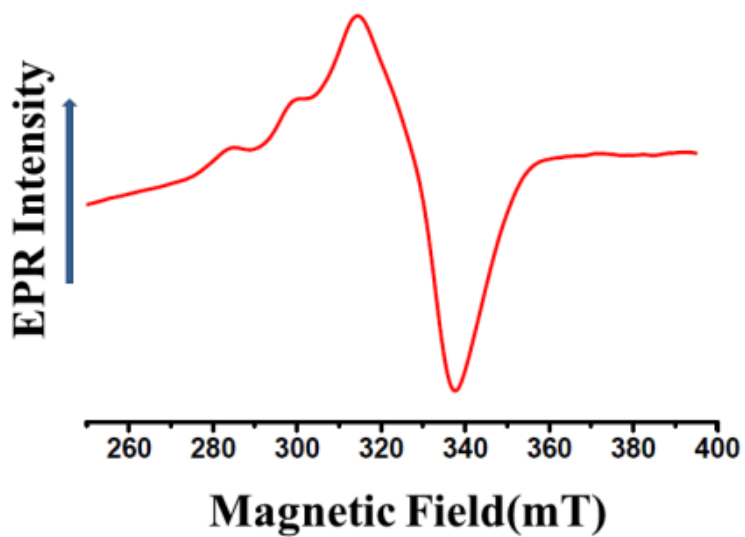

Figure 28S: EPR spectrum of [2]CuPR(ClO<sub>4</sub>)<sub>2</sub> in CH<sub>3</sub>CN at 80K.

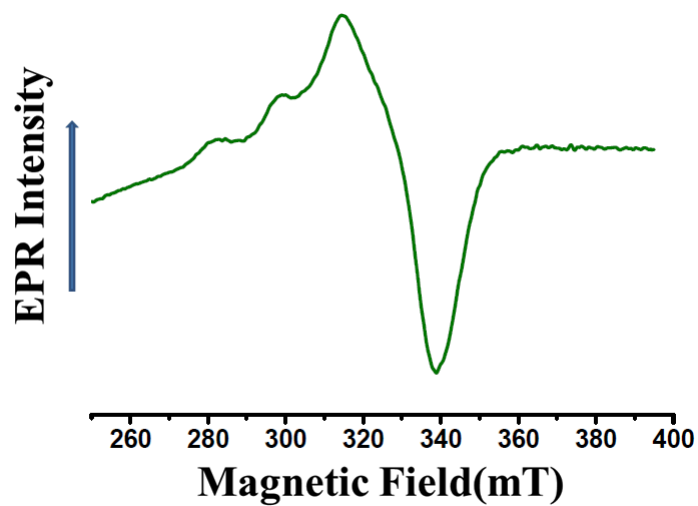

Figure 29S. EPR spectrum of [3]CuPR(ClO<sub>4</sub>)<sub>4</sub> in CH<sub>3</sub>CN at 80K.

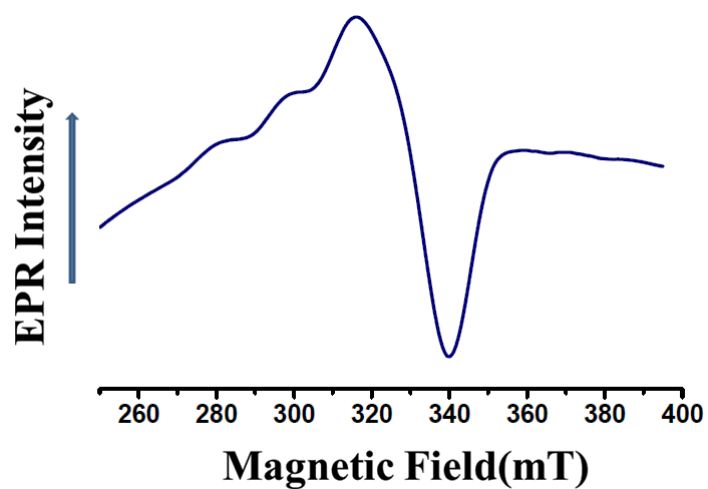

Figure 30S. EPR spectrum of [4]CuPR(ClO<sub>4</sub>)<sub>6</sub> in CH<sub>3</sub>CN at 80K.

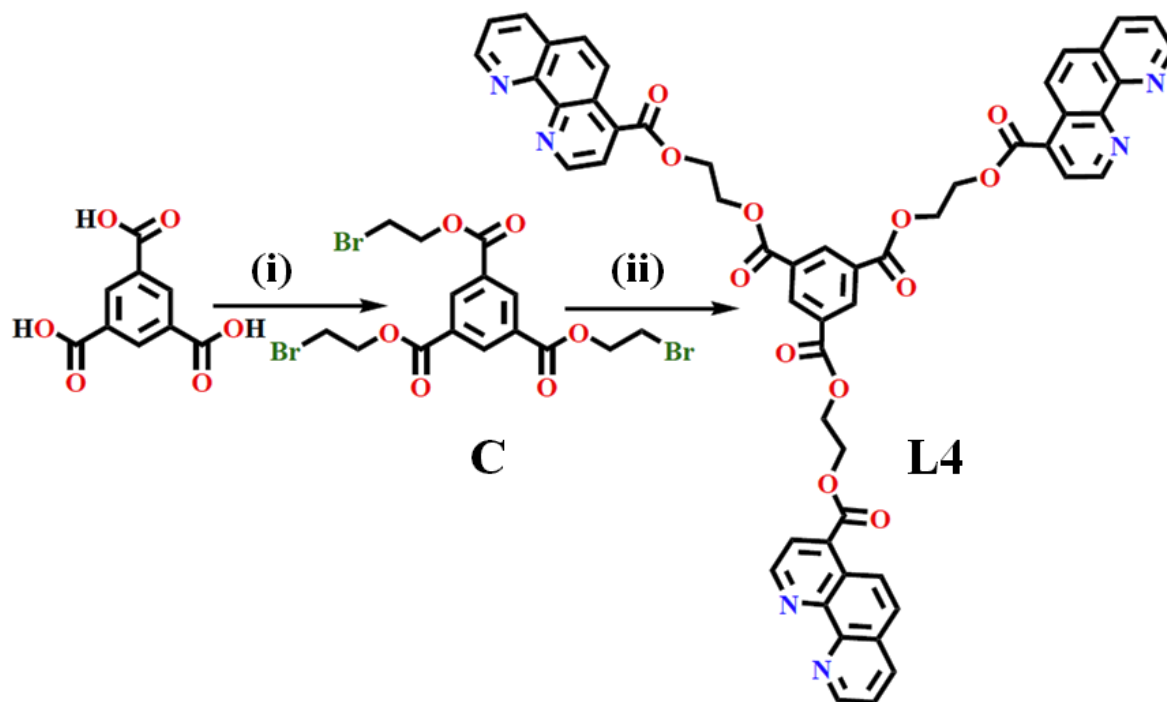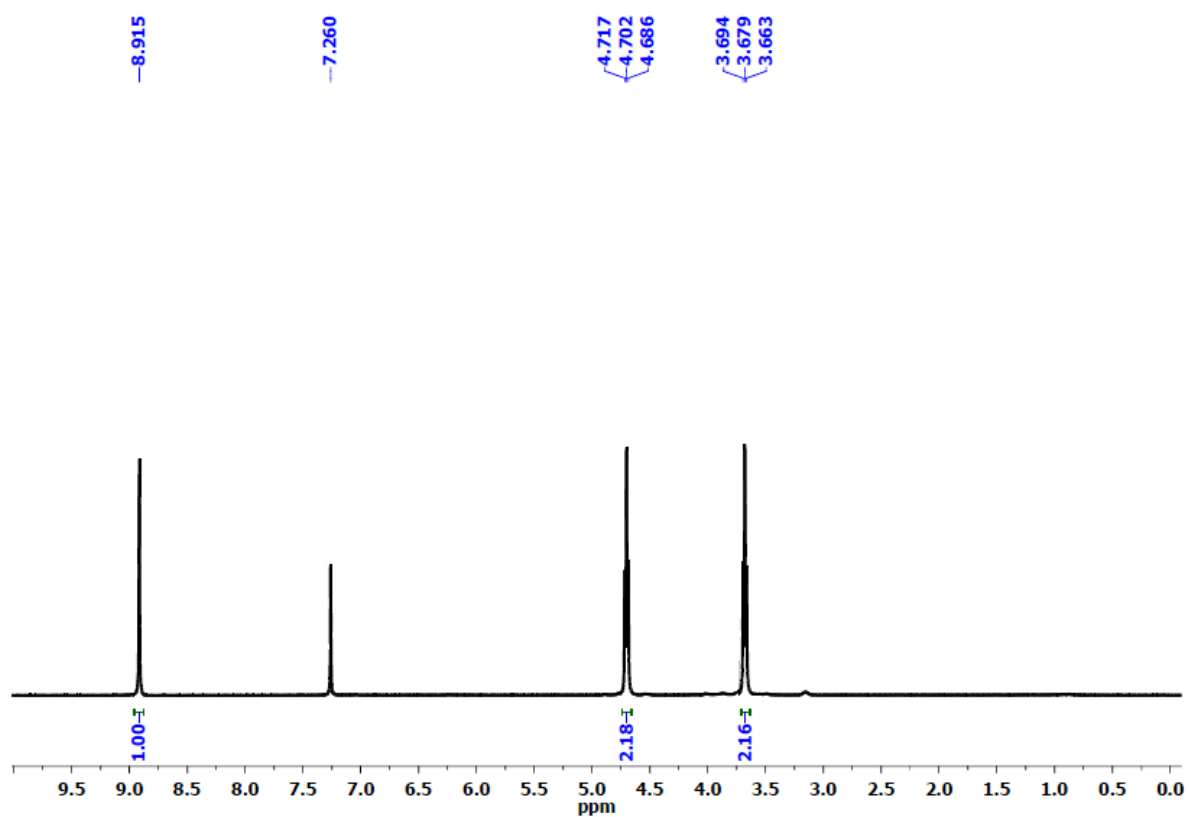

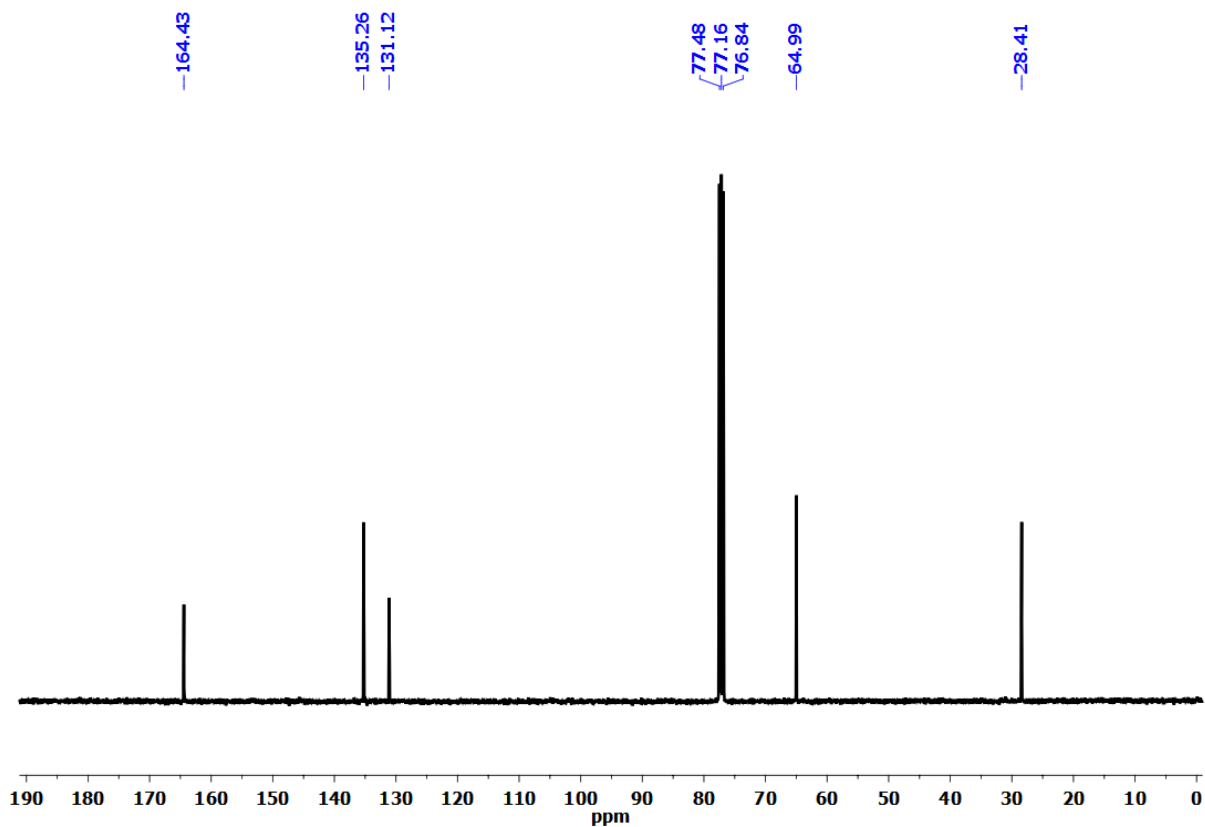

Figure 32S.  $^{13}\text{C}$ -NMR spectrum of compound **C** in  $\text{CDCl}_3$  in 100 MHz at 298K.

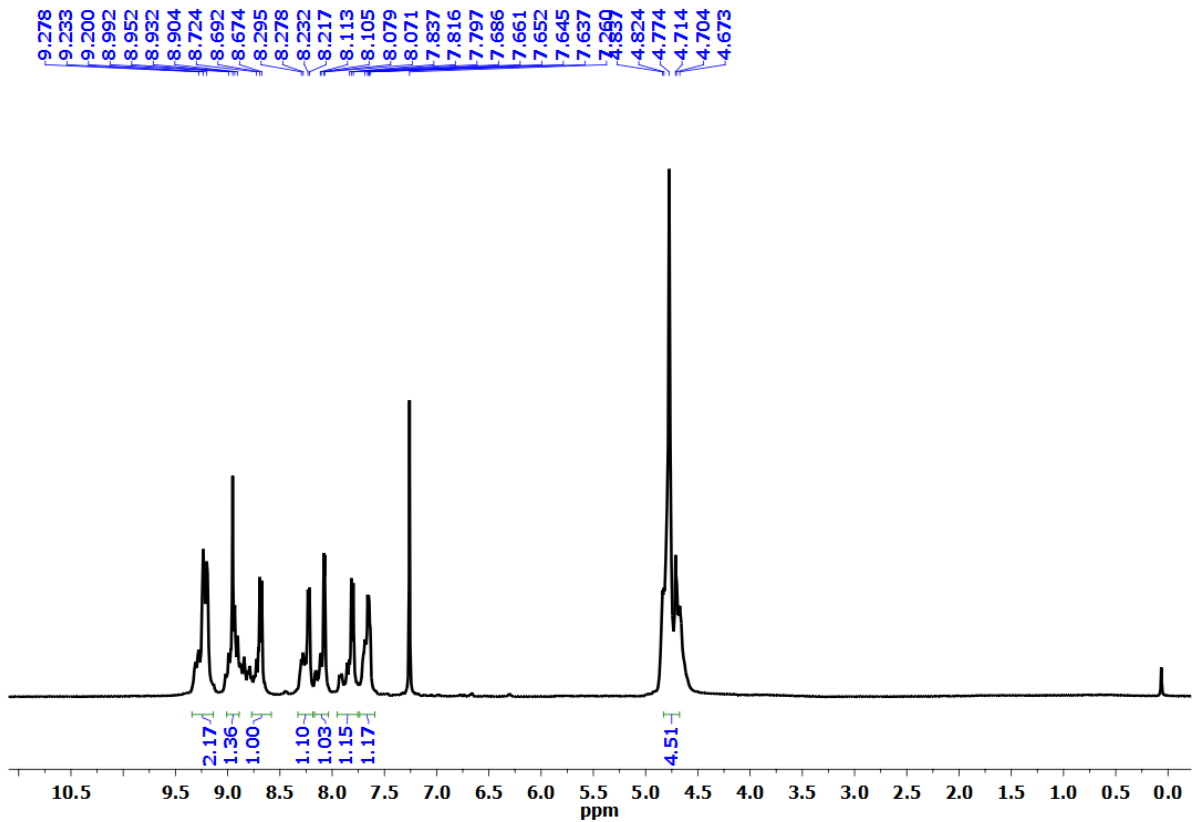

Figure 33S.  $^1\text{H}$ -NMR spectrum of **L4** in  $\text{CDCl}_3$  in 500 MHz at 298K.

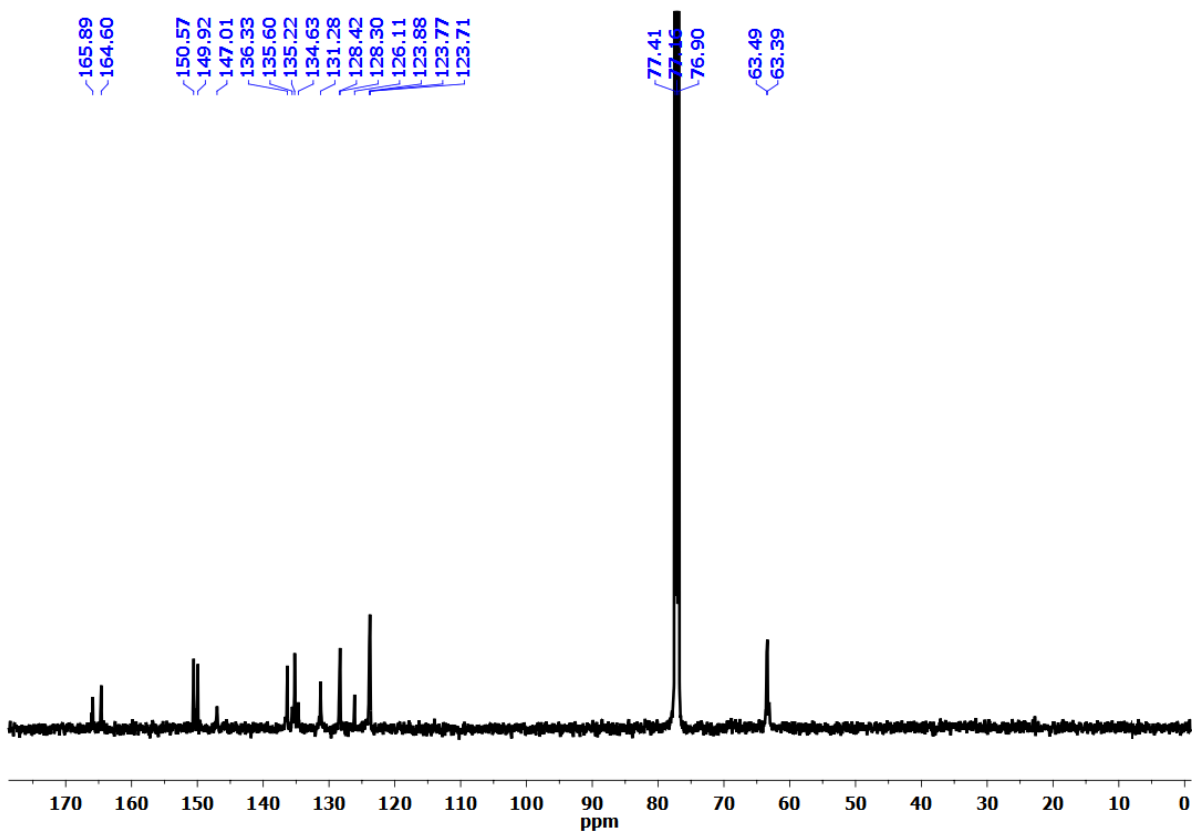

Figure 34S.  $^{13}\text{C}$ -NMR spectrum of **L4** in  $\text{CDCl}_3$  in 125 MHz at 298K.

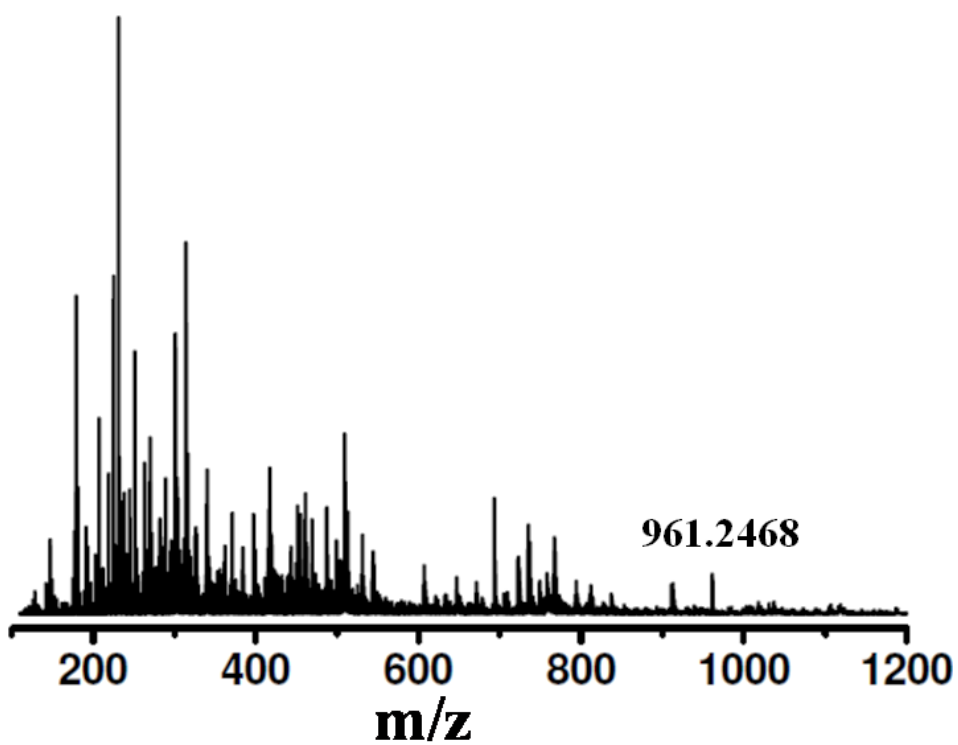

Figure 35S. ESI-MS(+ve) spectrum of **L4** at 298K.

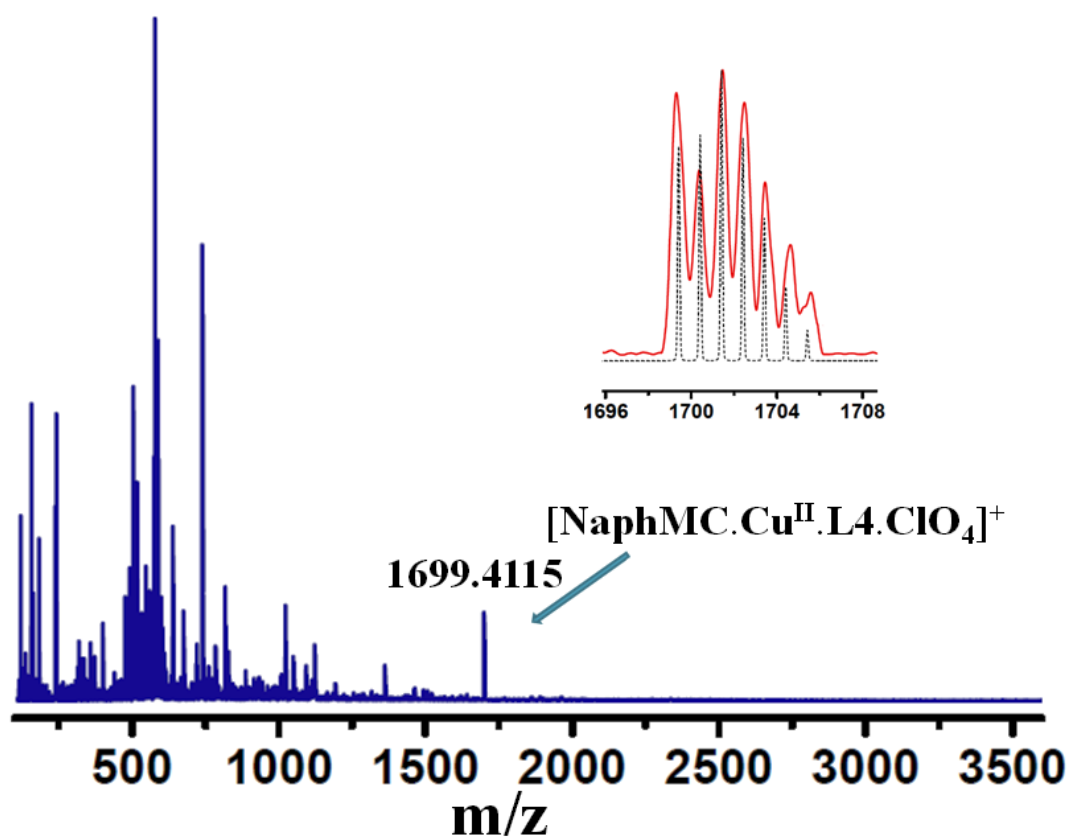

**Figure 36S.** ESI-MS(+ve) spectrum of L4 axle based threaded molecule at 298K.

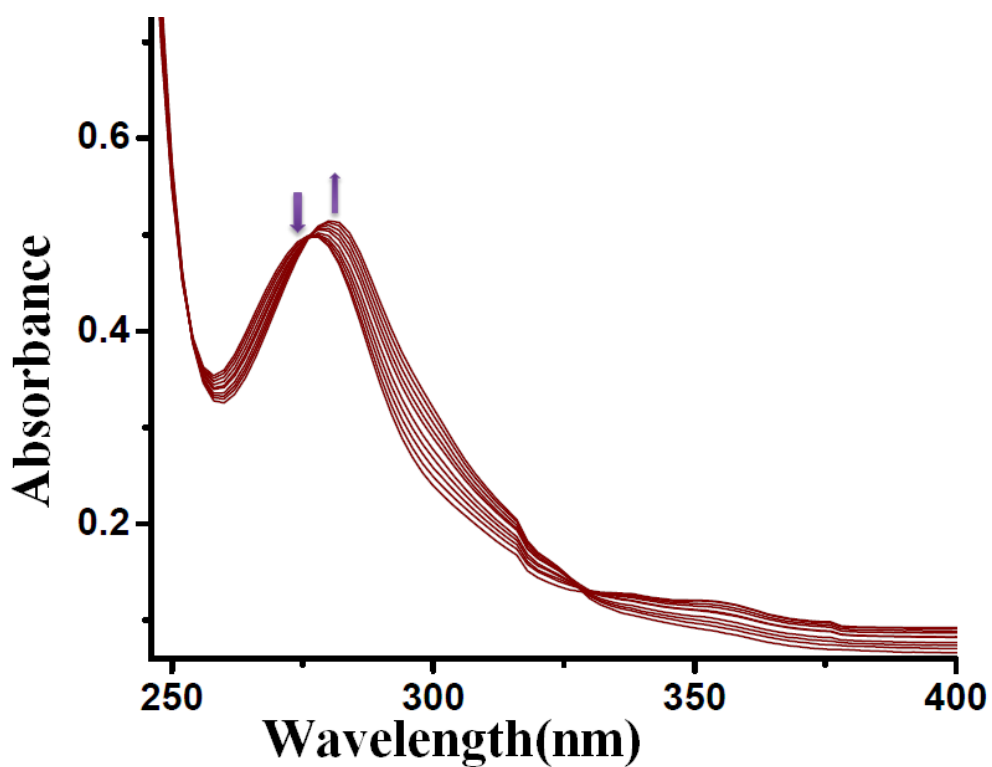

**Figure 37S.** UV/Vis titration profile between L4 ( $1 \times 10^{-5}$  M) with NaphMC-Cu(II) ( $1 \times 10^{-4}$  M) in  $\text{CH}_3\text{CN}$  at 298 K.



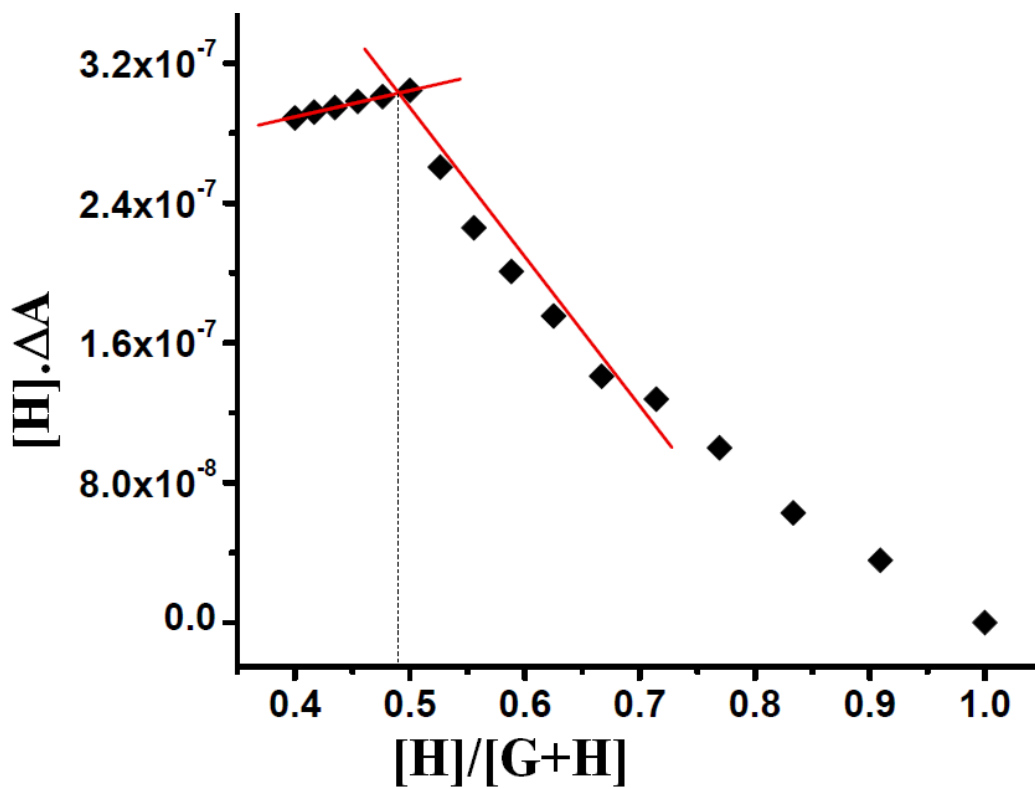

Figure 38S. Molar ratio plot from UV/Vis titration experiment between L4 with NaphMC-Cu(II) solution.

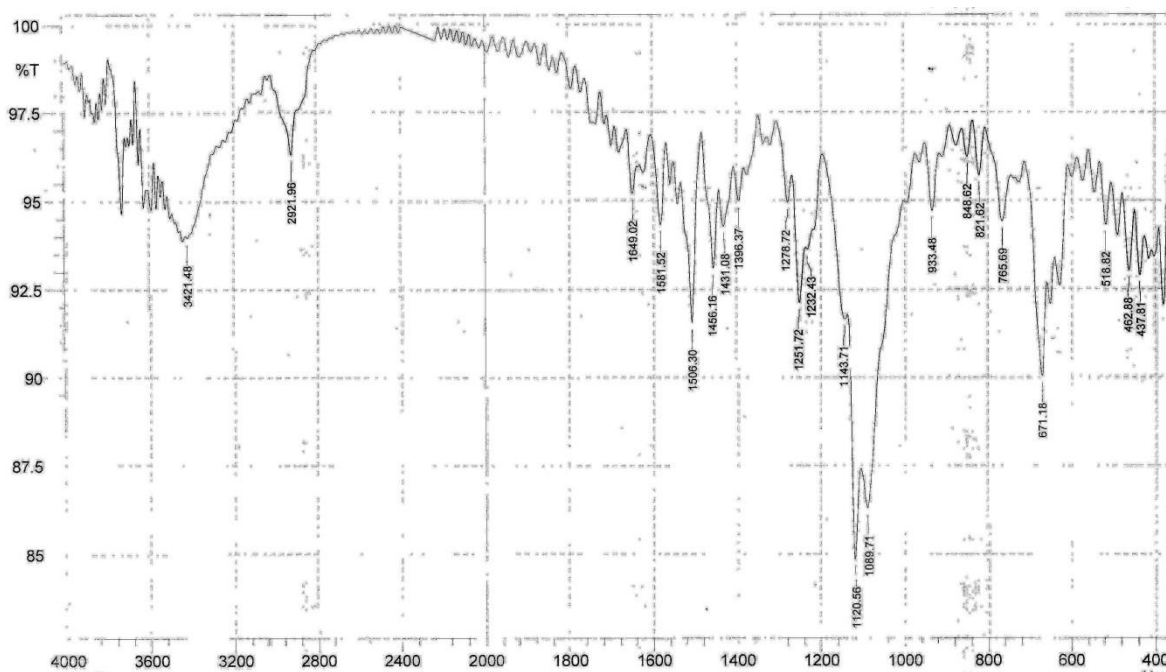

Figure 39S. FT-IR spectrum of  $[2]\text{CuPR}(\text{ClO}_4)_2$ .

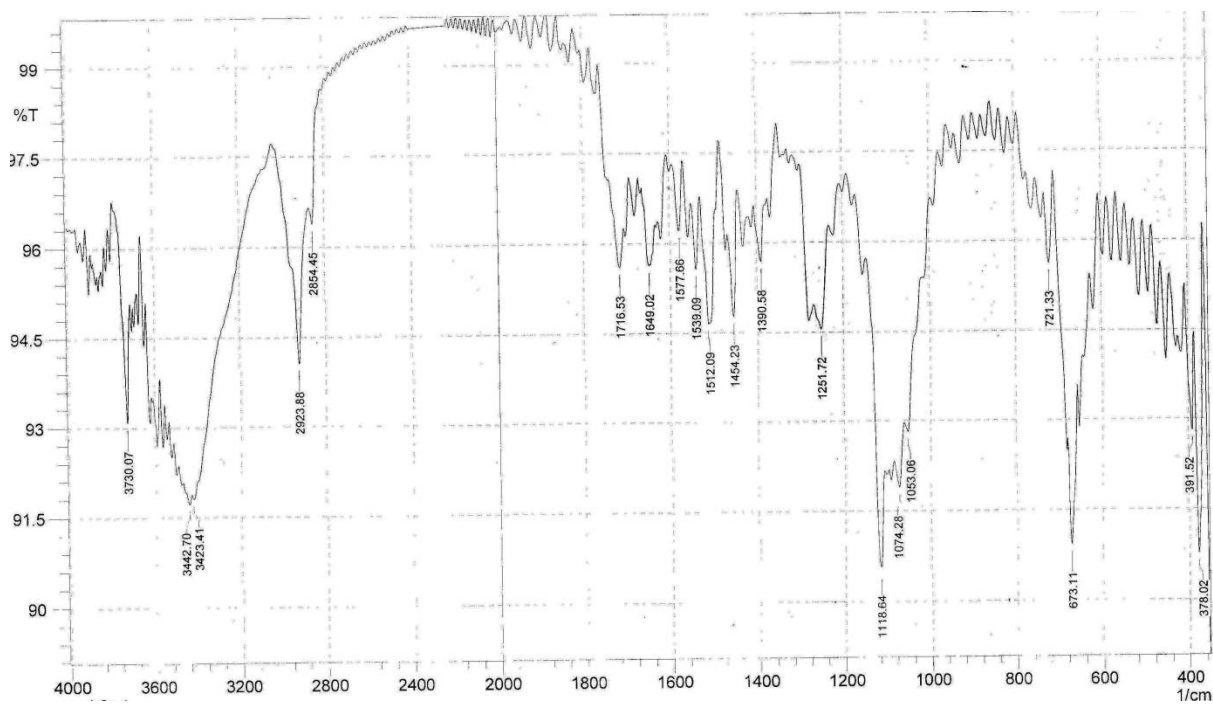

**Figure 40S.** FT-IR spectrum of  $[3]\text{CuPR}(\text{ClO}_4)_4$ .

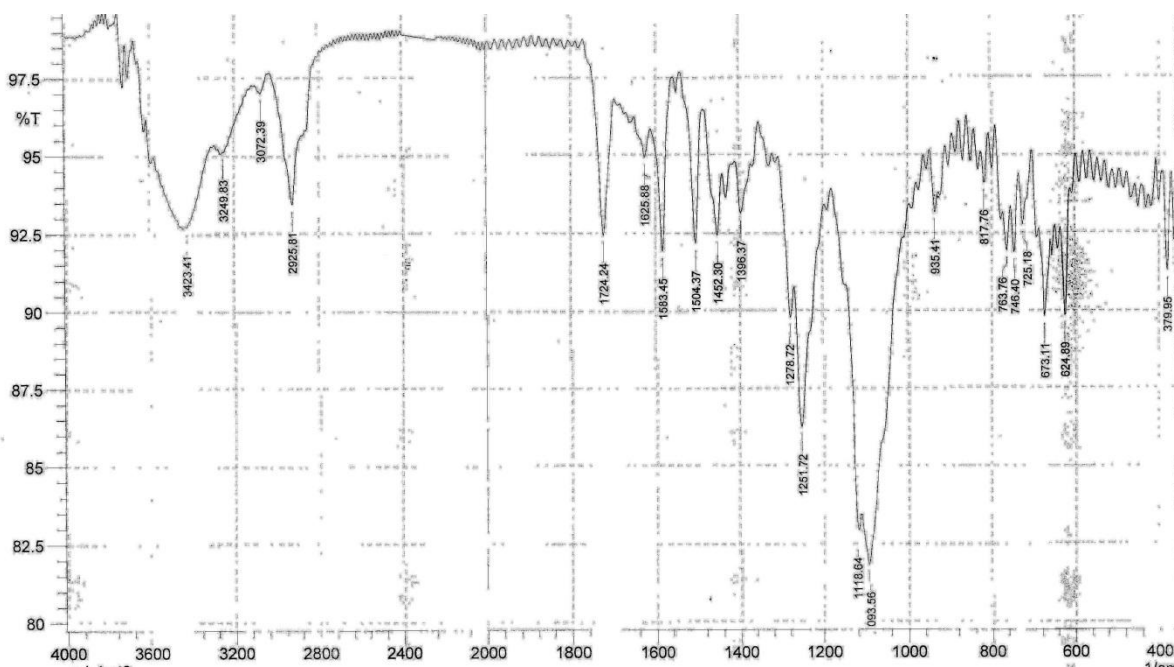

**Figure 41S.** FT-IR spectrum of  $[4]\text{CuPR}(\text{ClO}_4)_6$ .

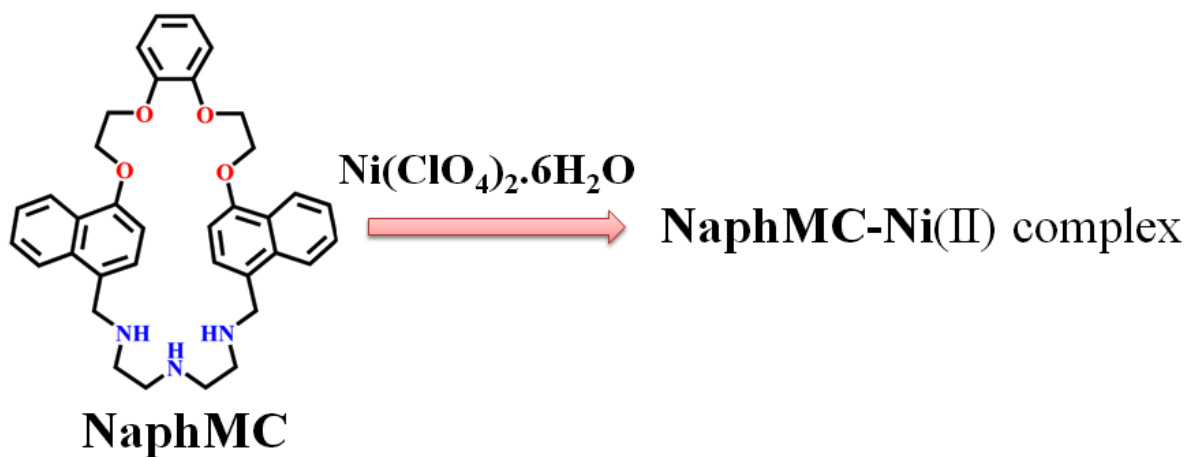

Scheme 5S. Synthetic route of NaphMC-Ni(II) complex

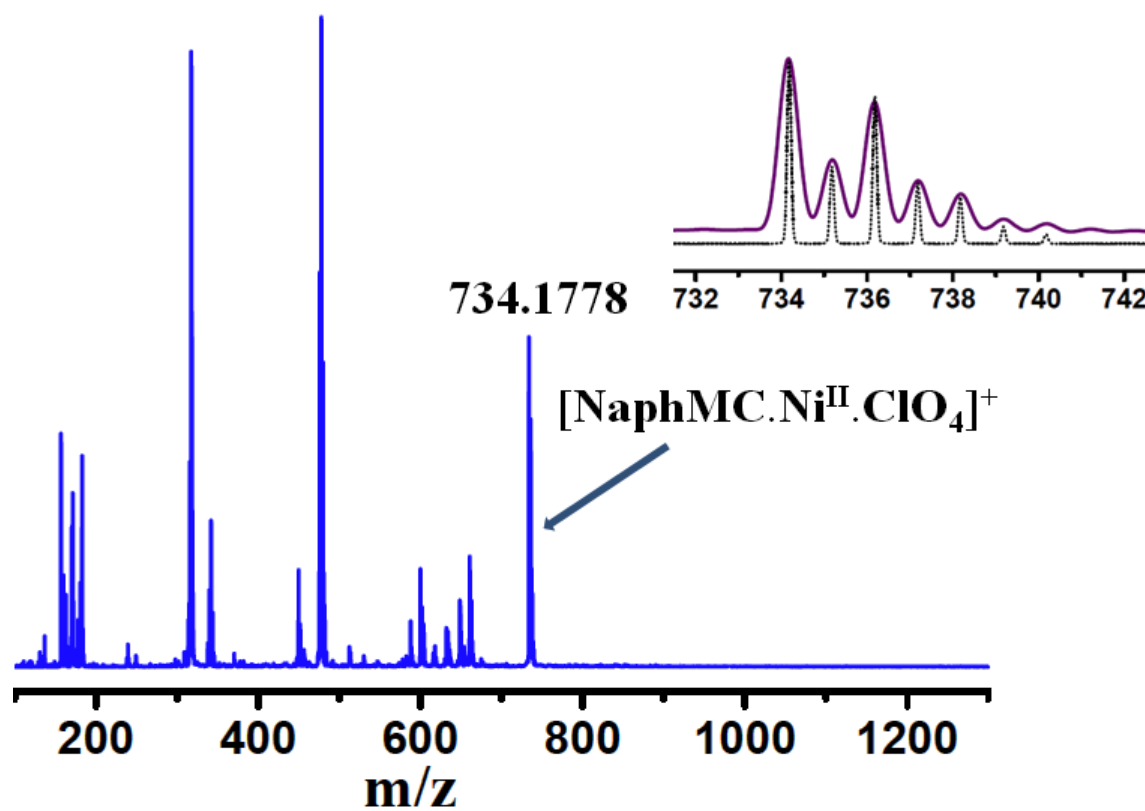

Figure 42S. ESI-MS(+ve) spectrum of NaphMC-Ni(II) complex at 298K.

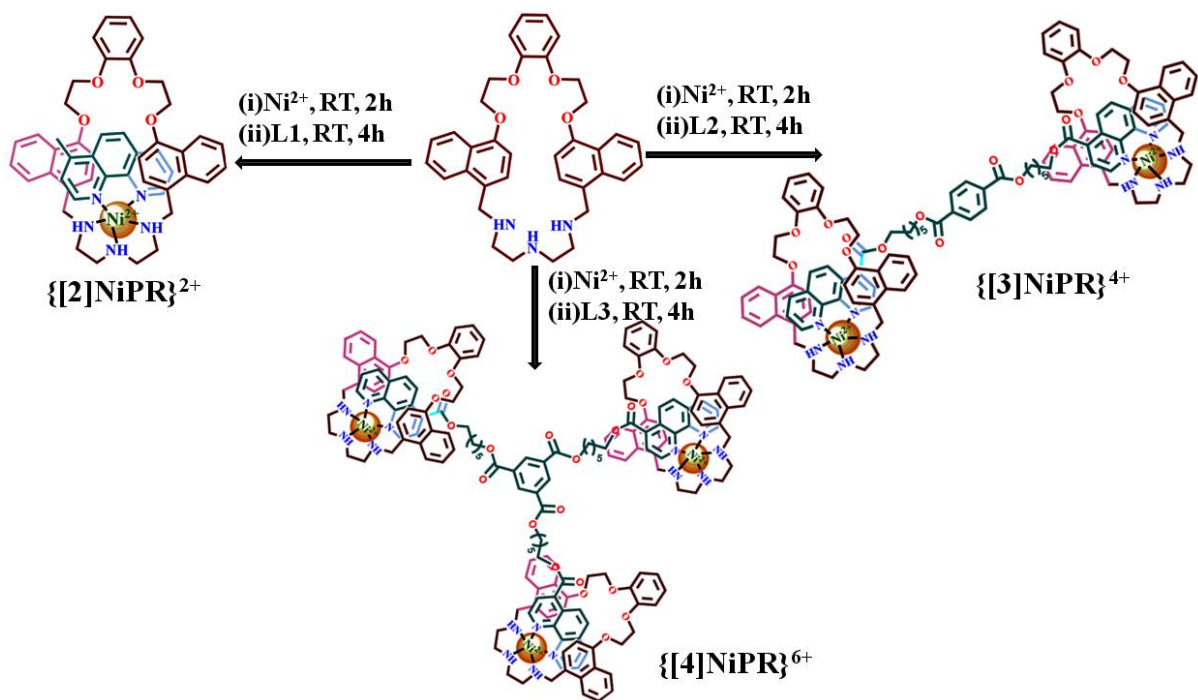

**Scheme 6S.** Synthetic route of formation of [2], [3], [4]pseudorotaxanes ( $\{[2]\text{NiPR}\}^{2+}$ ,  $\{[3]\text{NiPR}\}^{4+}$  and  $\{[4]\text{NiPR}\}^{6+}$ ). Counter anions ( $\text{ClO}_4^-$ ) are omitted for clarity.

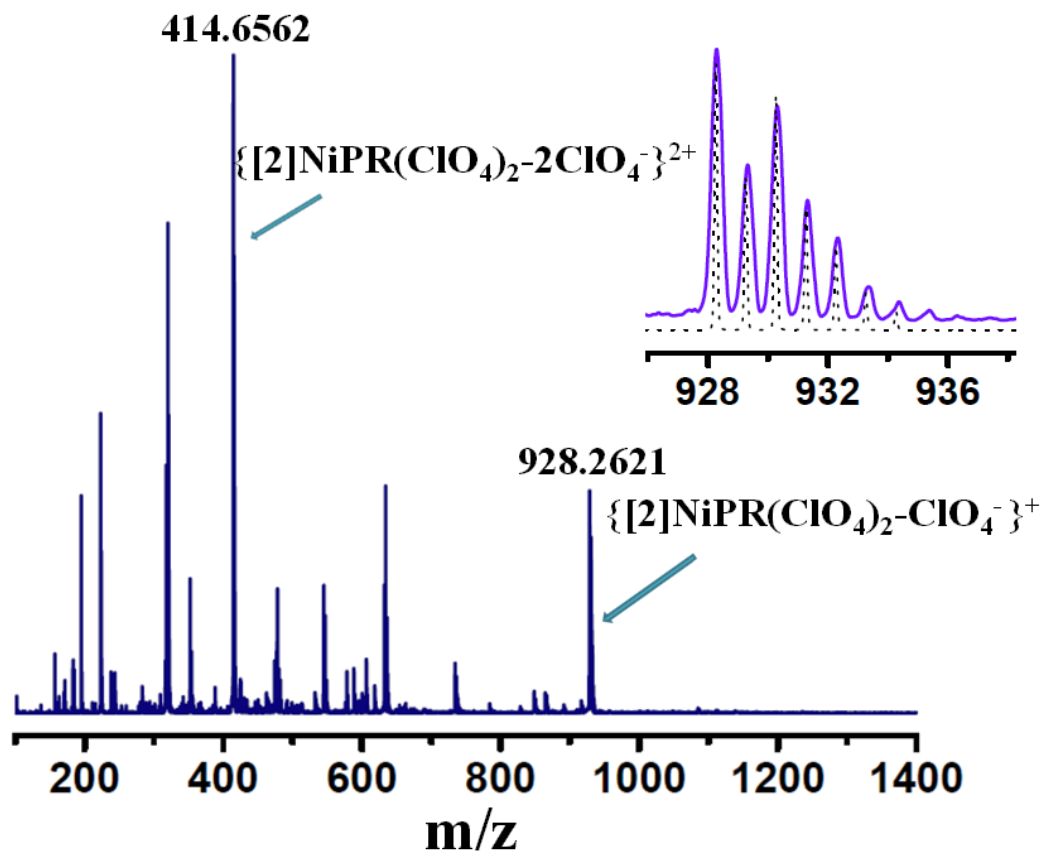

**Figure 43S.** ESI-MS(+ve) spectrum of  $[2]\text{NiPR}(\text{ClO}_4)_2$  at 298K.

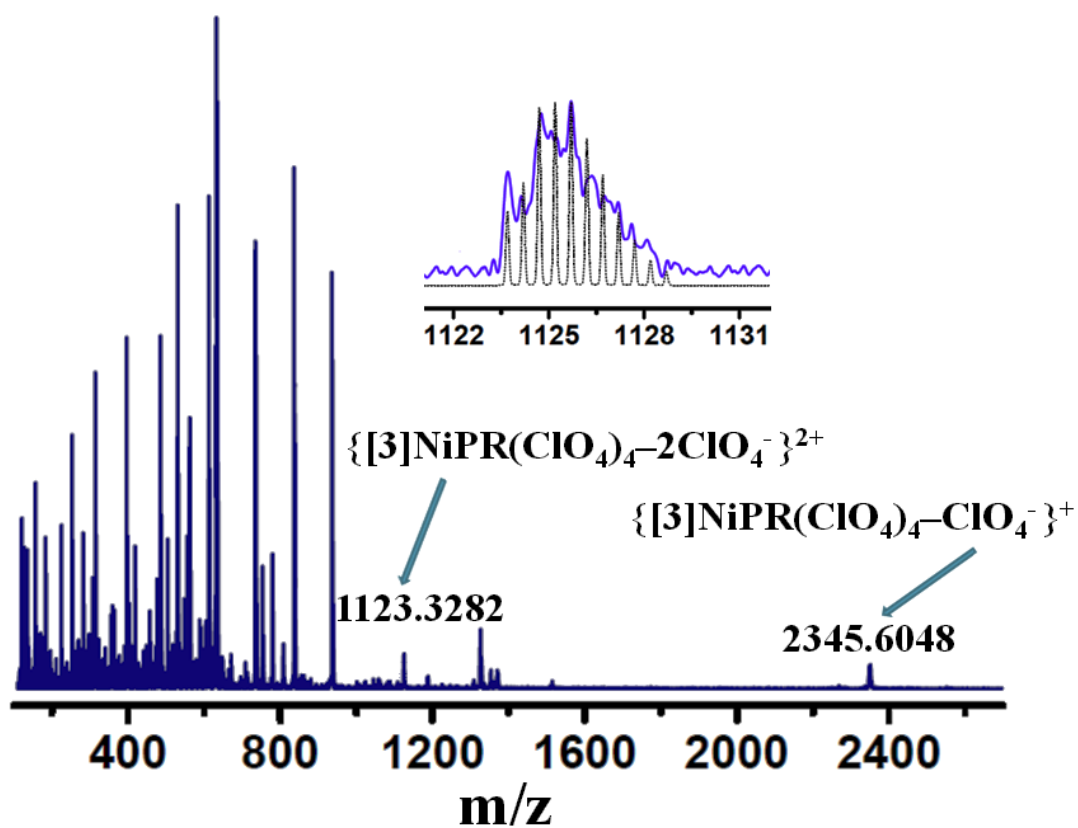

Figure 44S. ESI-MS(+ve) spectrum of  $[3]\text{NiPR}(\text{ClO}_4)_4$  at 298K.

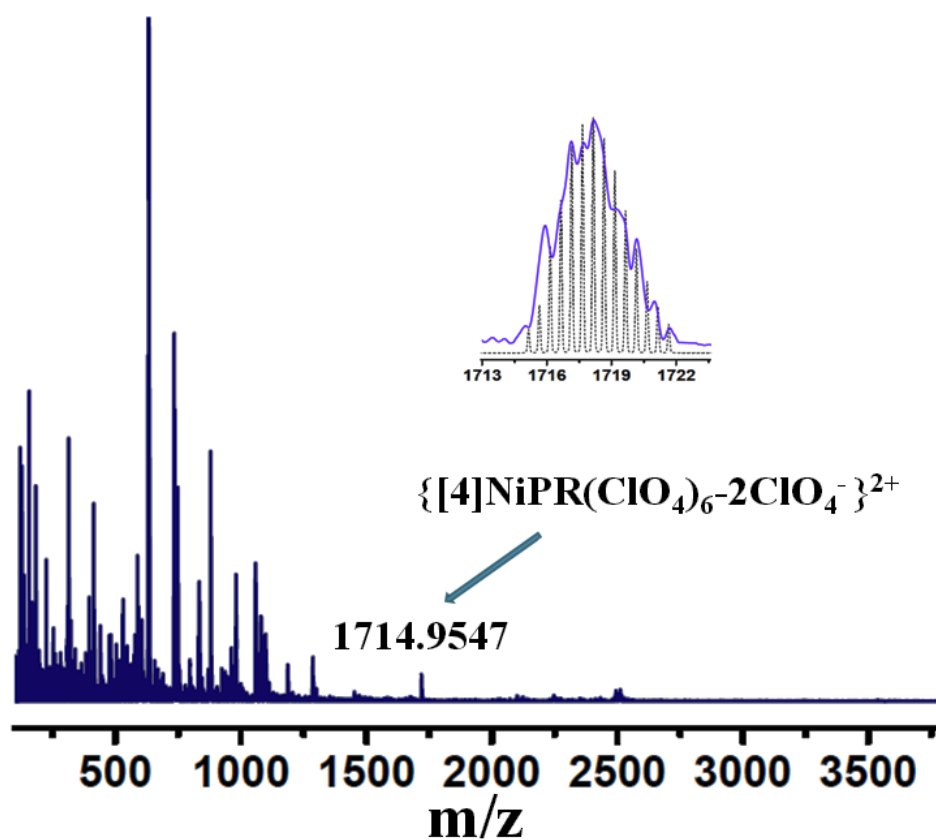

Figure 45S. ESI-MS(+ve) spectrum of  $[4]\text{NiPR}(\text{ClO}_4)_6$  at 298K.

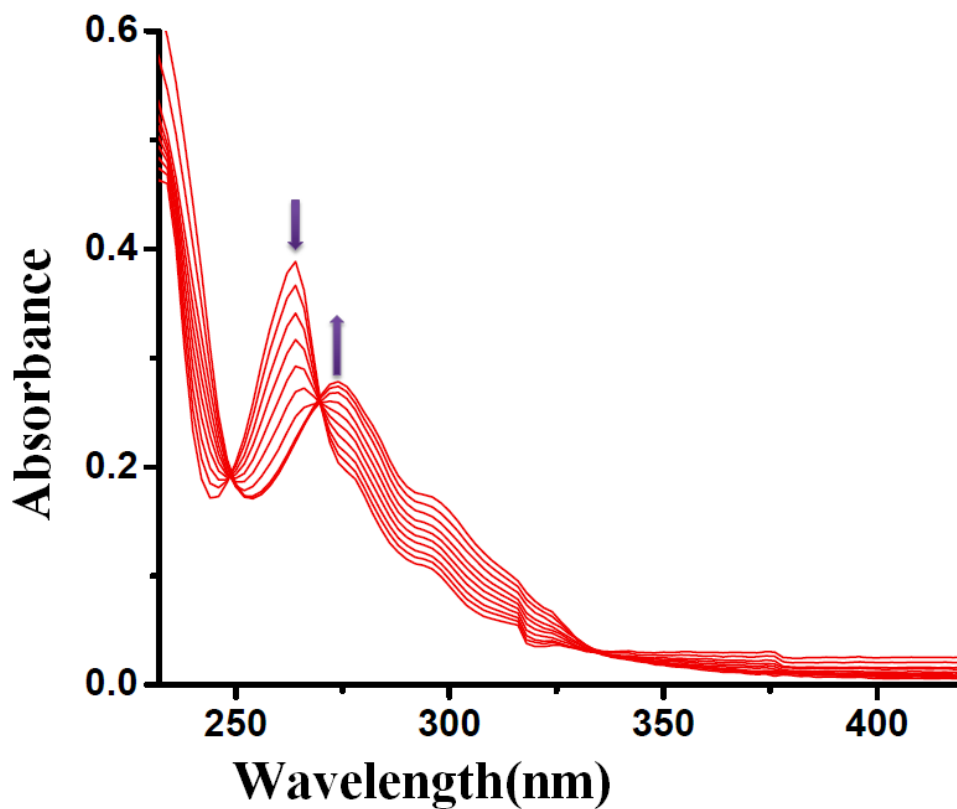

**Figure 46S.** UV/Vis titration profile between **L1** ( $1 \times 10^{-5}$  M) with **NaphMC-Ni(II)** ( $1 \times 10^{-4}$  M) in CH<sub>3</sub>CN at 298 K.

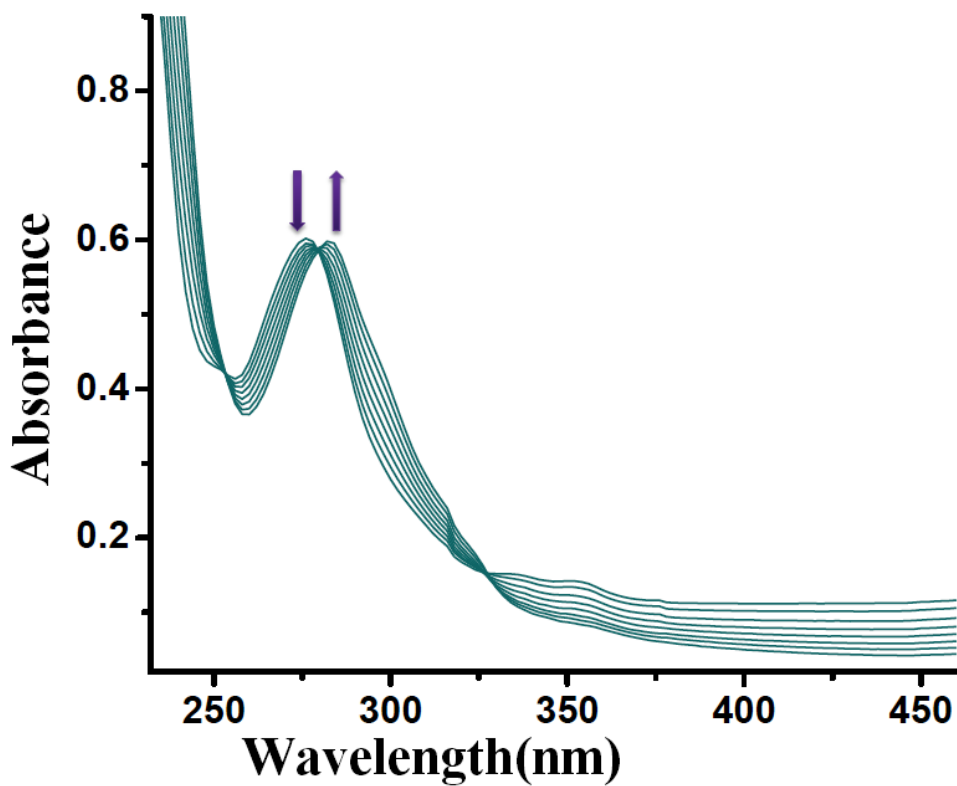

**Figure 47S.** UV/Vis titration profile between **L2** ( $1 \times 10^{-5}$  M) with **NaphMC-Ni(II)** ( $2.2 \times 10^{-4}$  M) in CH<sub>3</sub>CN at 298 K.

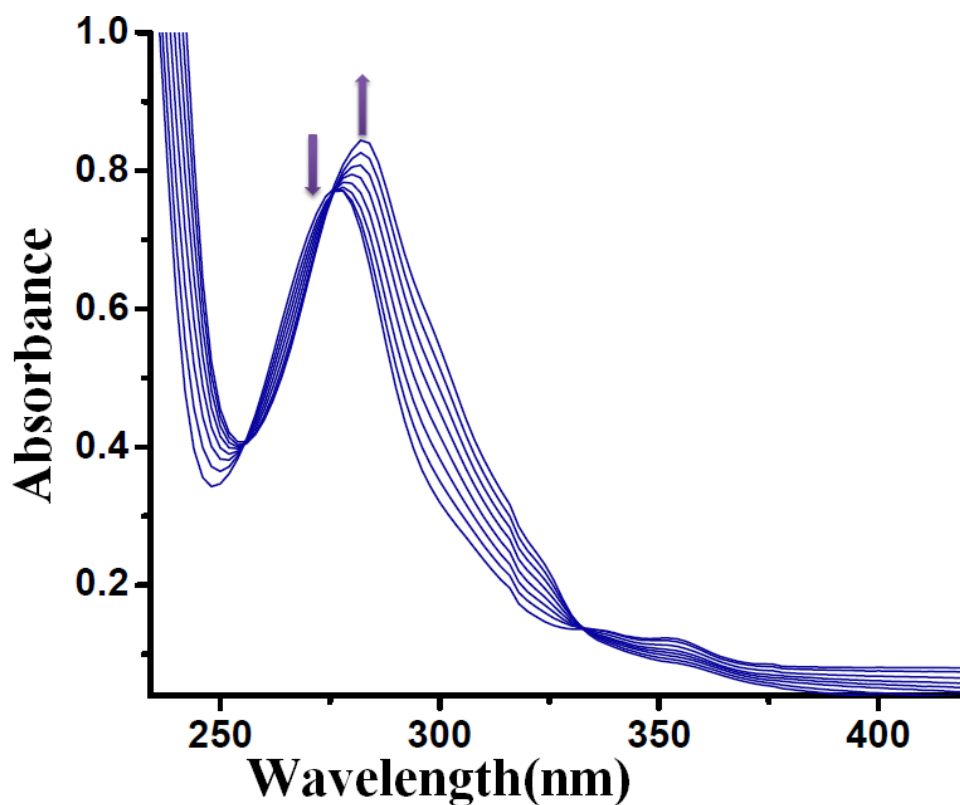

**Figure 48S.** UV/Vis titration profile between L3 ( $1 \times 10^{-5}$  M) with NaphMC-Ni(II) ( $3.8 \times 10^{-4}$  M) in  $\text{CH}_3\text{CN}$  at 298 K.

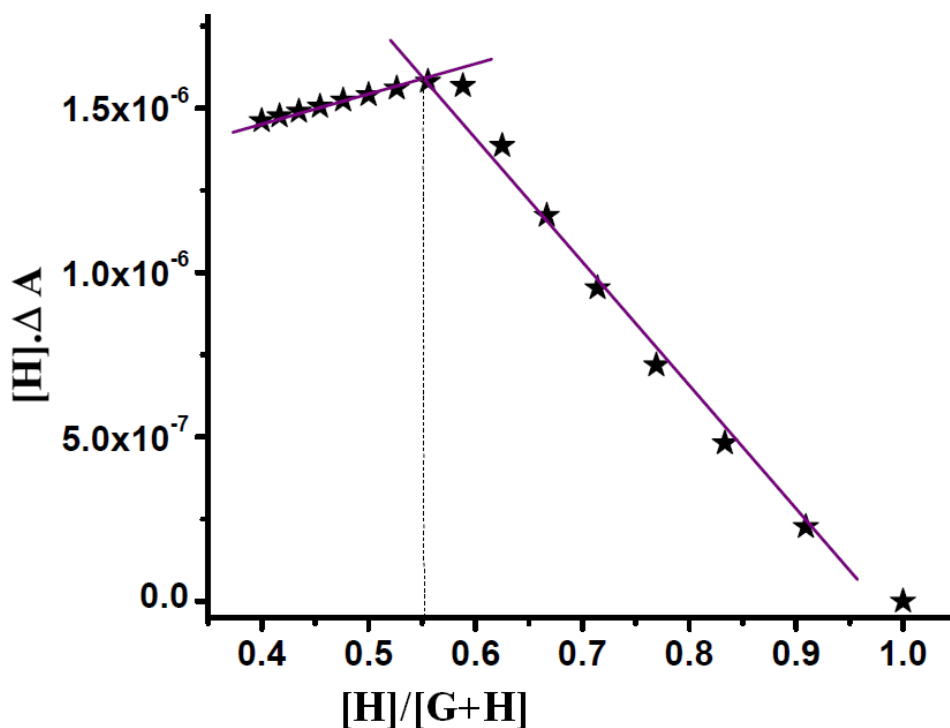

**Figure 49S.** Molar ratio plot from UV/Vis titration experiment between L1 with NaphMC-Ni(II) solution.

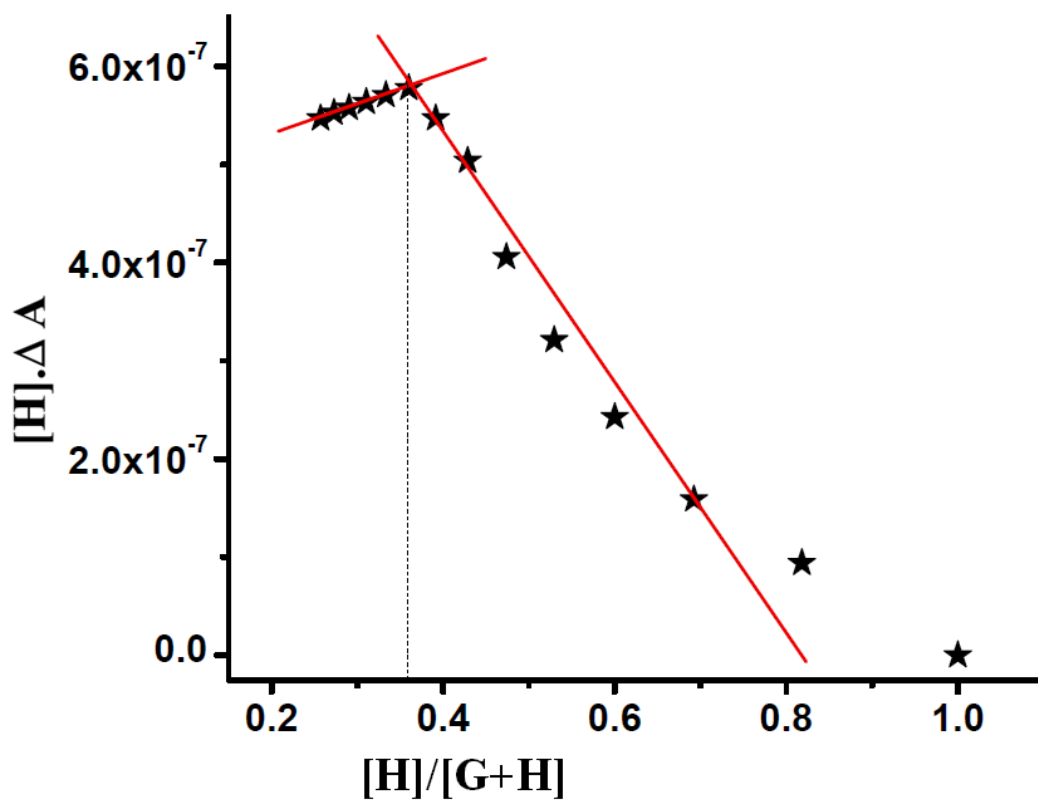

**Figure 50S.** Molar ratio plot from UV/Vis titration experiment between **L2** with **NaphMC-Ni(II)** solution.

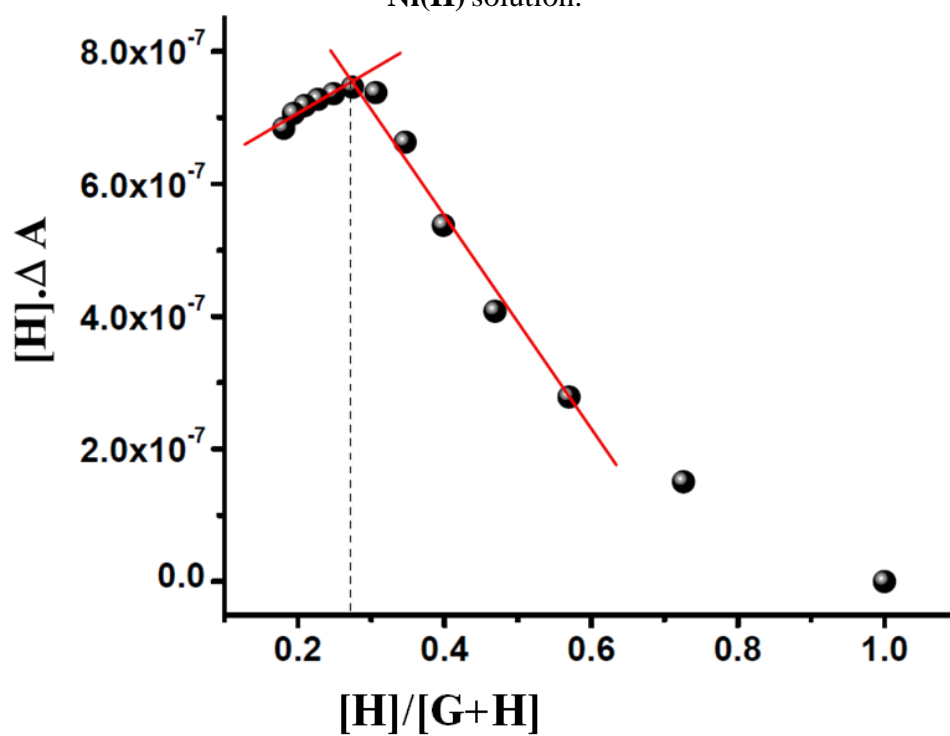

**Figure 51S.** Molar ratio plot from UV/Vis titration experiment between **L3** with **NaphMC-Ni(II)** solution.



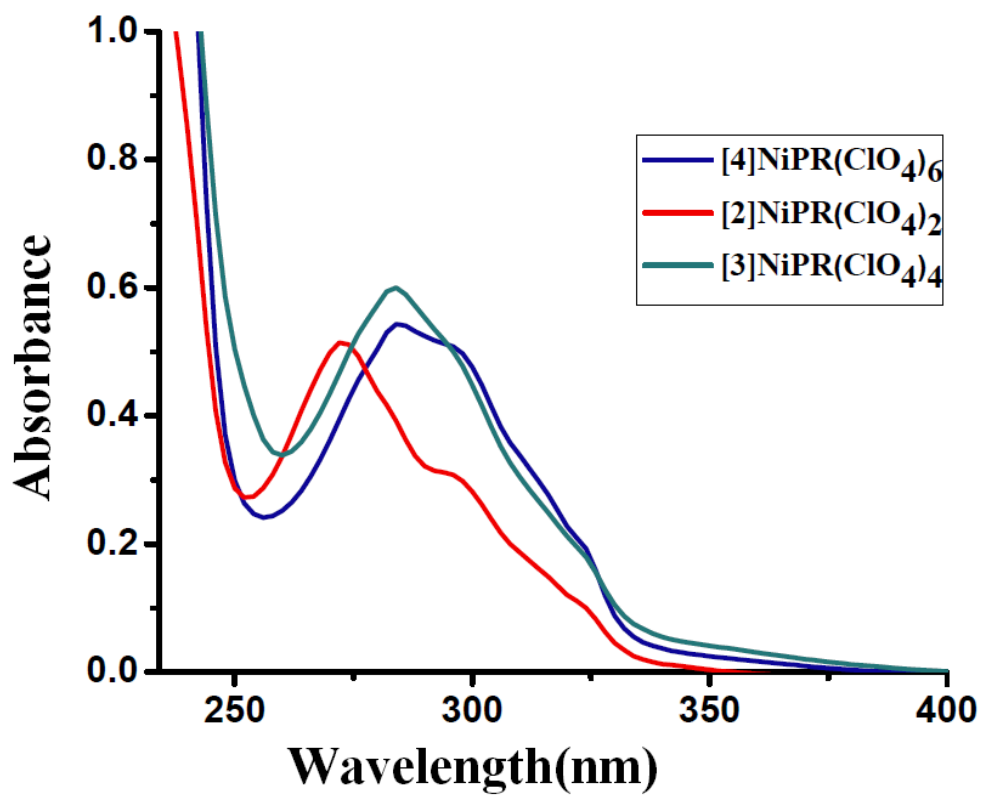

**Figure 52S.** Characteristic UV/Vis spectra of pseudorotaxanes: [2]NiPR(ClO<sub>4</sub>)<sub>2</sub>, [3]NiPR(ClO<sub>4</sub>)<sub>4</sub> and [4]NiPR(ClO<sub>4</sub>)<sub>6</sub> at 298K.

## References

1. APEX2 suite for crystallographic software, Bruker axs, Madison, WI (2009).
2. SAINT - Software for the Integration of CCD Detector System Bruker Analytical X-ray Systems, Bruker axs, Madison, WI (1995).
3. G. M. Sheldrick, SHELXT 14. Program for Crystal Structure Solution and Refinement, University of Göttingen, Göttingen, 2014.
4. O.V. Dolomanov and L.J. Bourhis and R.J. Gildea and J.A.K. Howard and H. Puschmann, Olex2: A complete structure solution, refinement and analysis program, *J. Appl. Cryst.*, (2009), **42**, 339-341.
5. Sheldrick, G.M., Crystal structure refinement with ShelXL, *Acta Cryst.*, (2015), **C71**, 3-8.
6. G. M. Sheldrick, SADABS, Empirical Absorption Correction Program, University of Göttingen, Göttingen, Germany, 1997.
7. A. L. Spek, PLATON-97, University of Utrecht, Utrecht, the Netherlands, 1997.
8. Mercury, version 3.7, supplied with Cambridge Structural Database, CCDC, Cambridge, U.K., 2003–2004.
9. (a) J. Cai, B. P. Hay, N. J. Young, X. Yang and J. L. Sessler, *Chem. Sci.*, 2013, **4**, 1560–1567; (b) P. Thordarson, *Chem. Soc. Rev.*, 2011, **40**, 1305–1323.
10. E. Pershagen, J. Nordholm and K. E. Borbas, *J. Am. Chem. Soc.*, 2012, **134**, 9832-9835.
11. S. Bej and P. Ghosh, *Dalton Trans.*, 2018, **47**, 13408-13418.
12. K. Hara, H. Sugihara, L. P. Singh, A. Islam, R. Katoh, M. Yanagida, K. Sayama, S. Murata and H. Arakawa, *J. Photochem. Photobiol., A*, 2001, **145**, 117-122.
